# Supplementary material for: Nomograms of human hippocampal volume shifted by polygenic scores
Source: eLife journal article supplement (doi:10.7554/elife.78232), 2022-08-08

R-Squared across P-Value Thresholds

Male

Left

Right

Bilateral

HV across PRS Percentiles for Threshold: 0.75

Left

Right

Bilateral

Female

Both

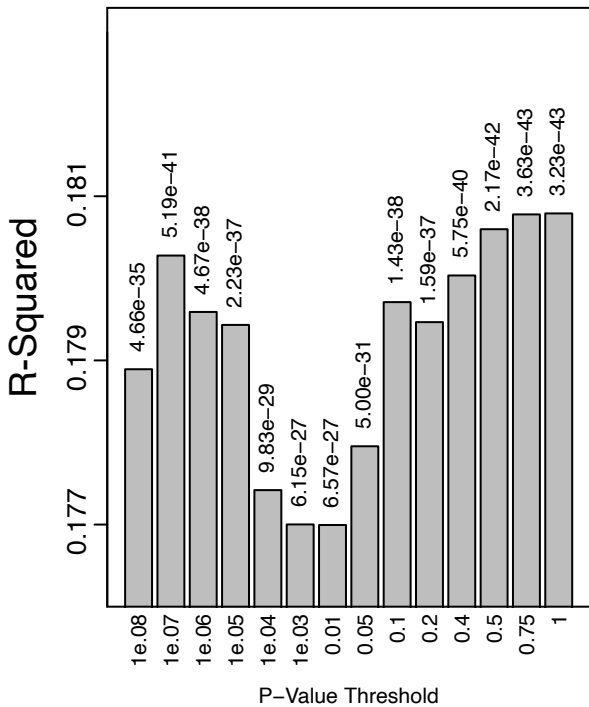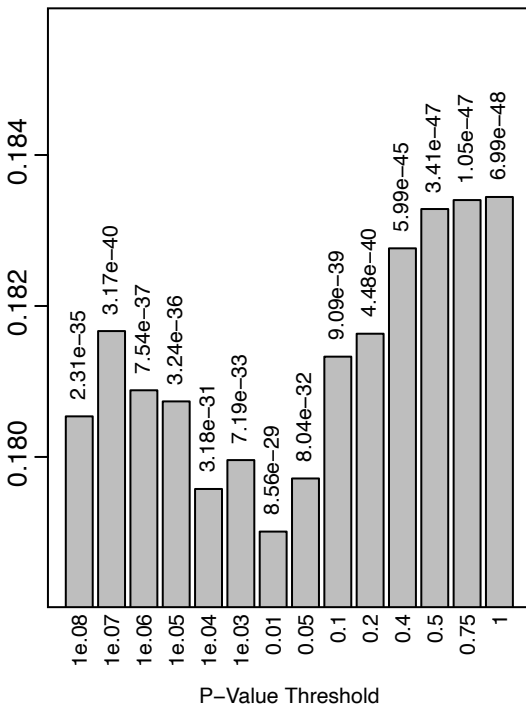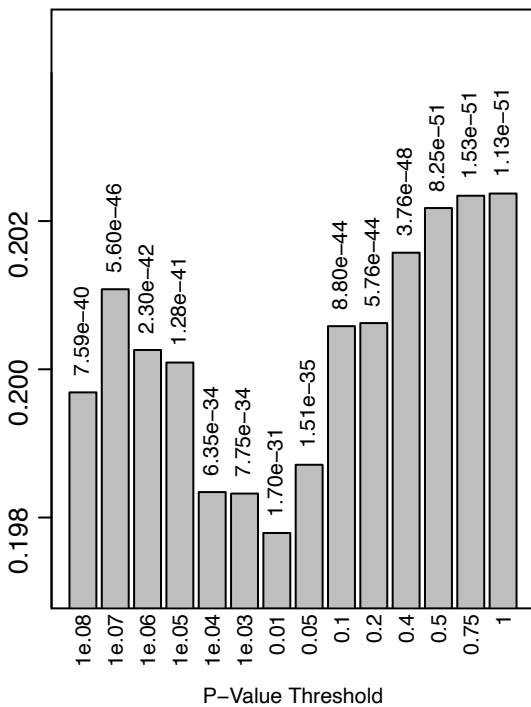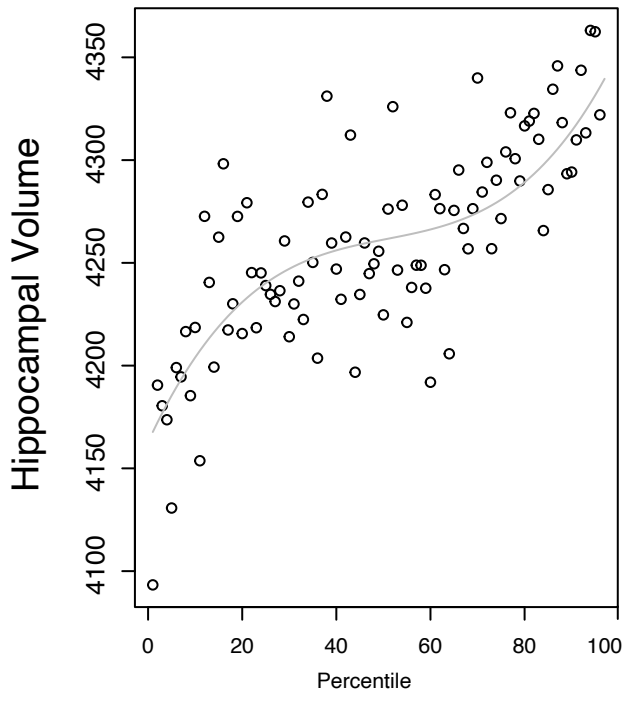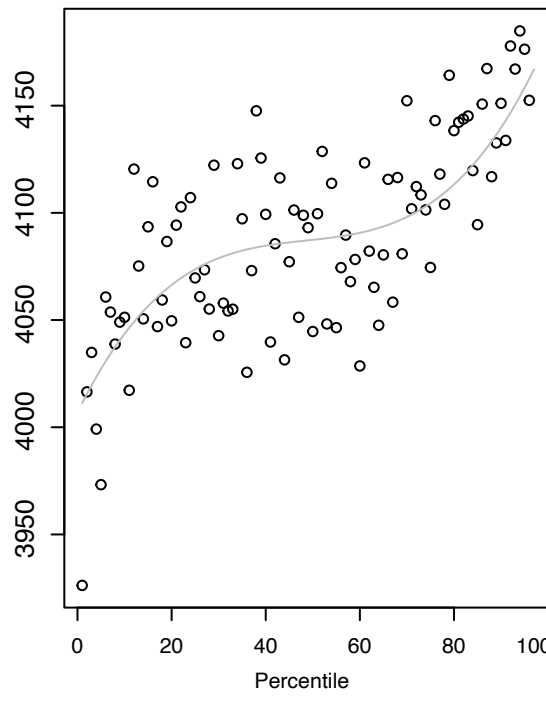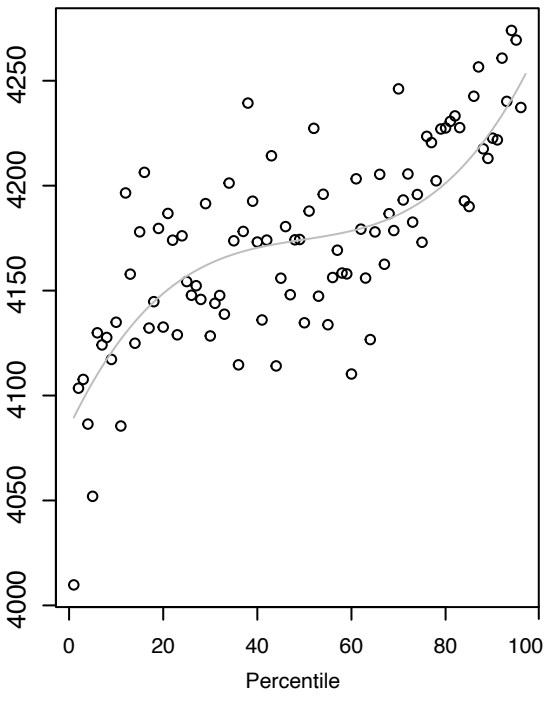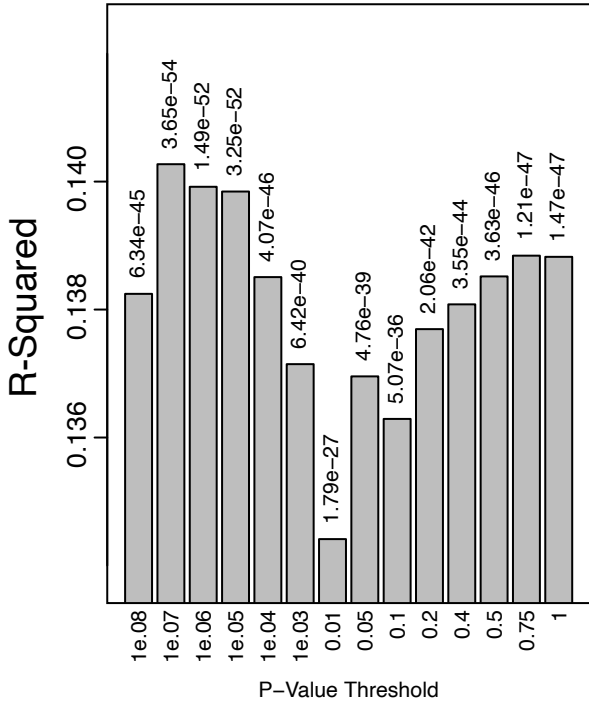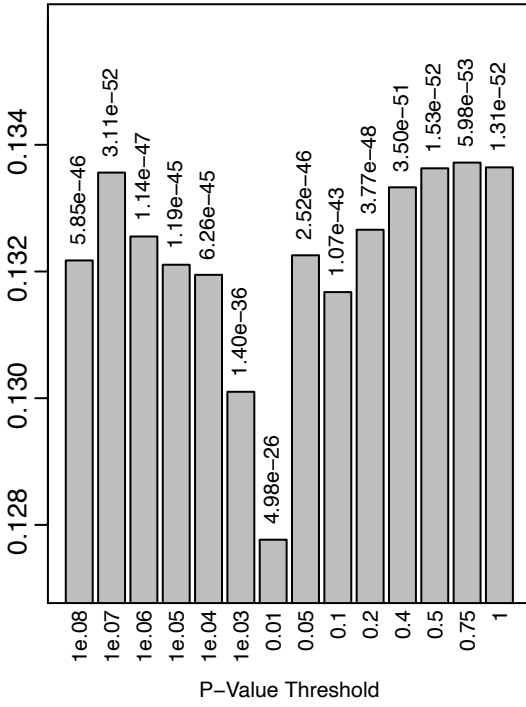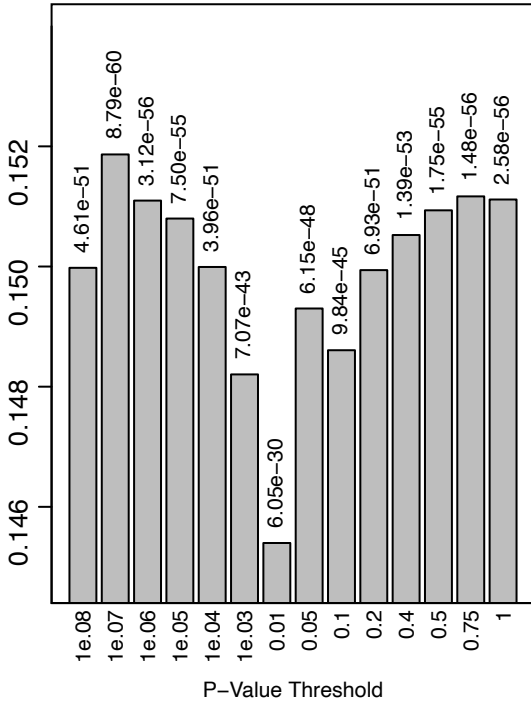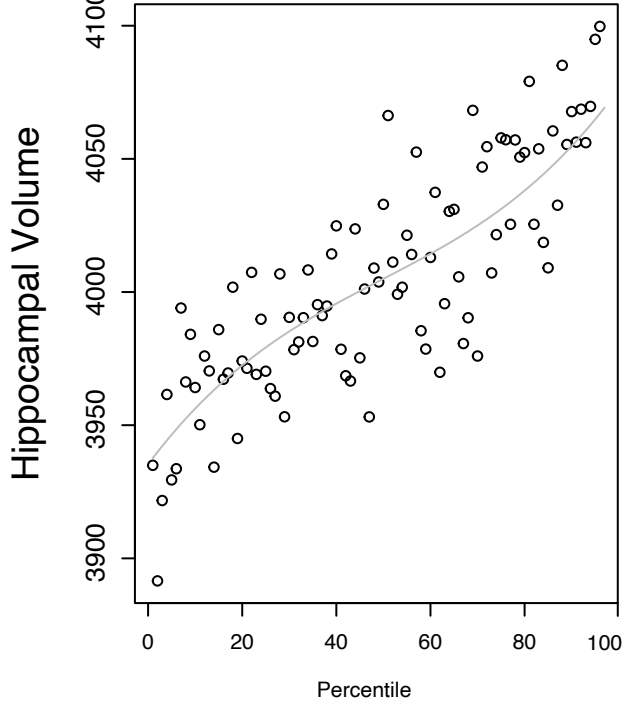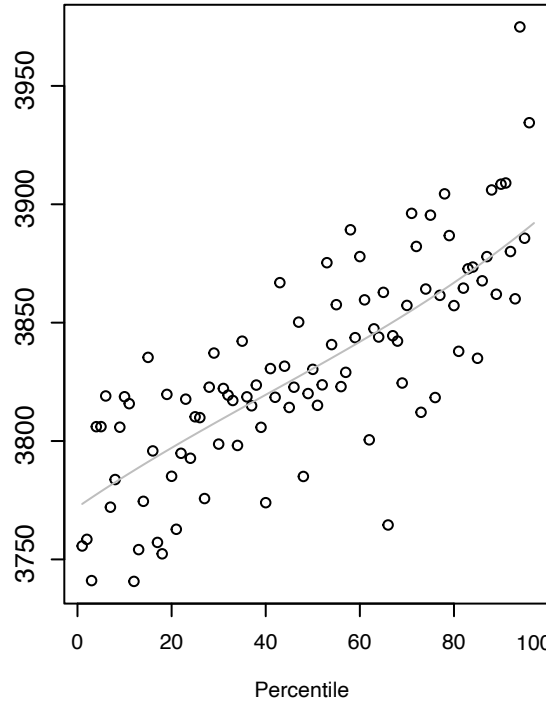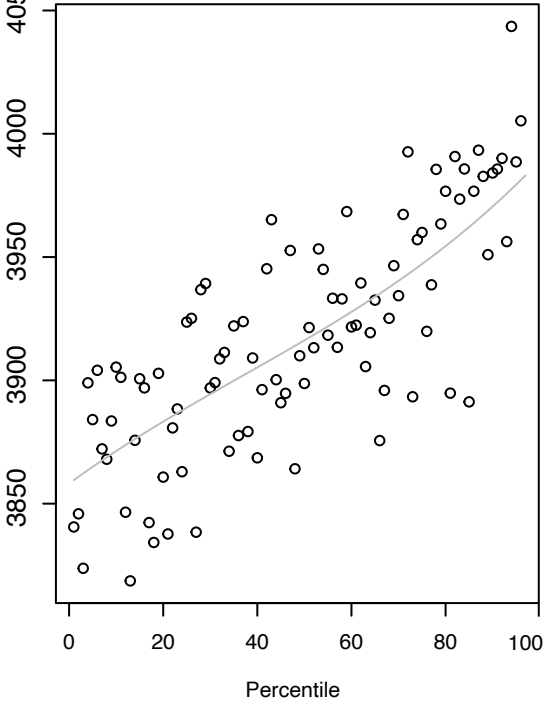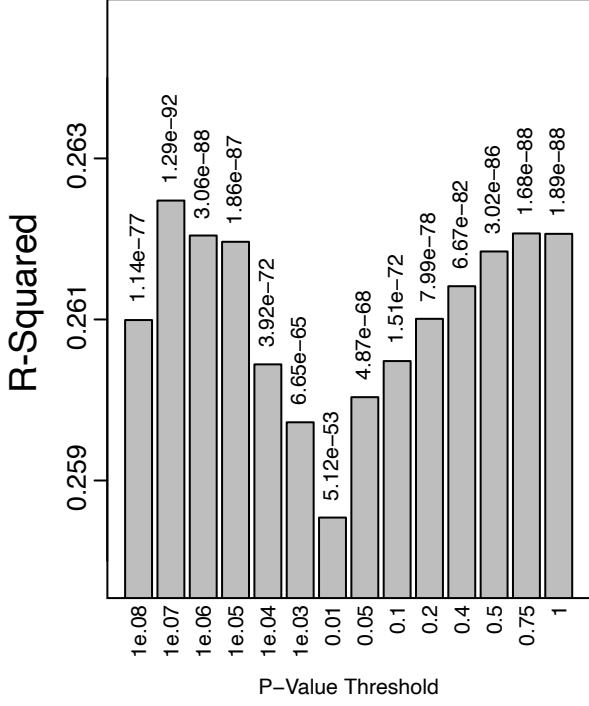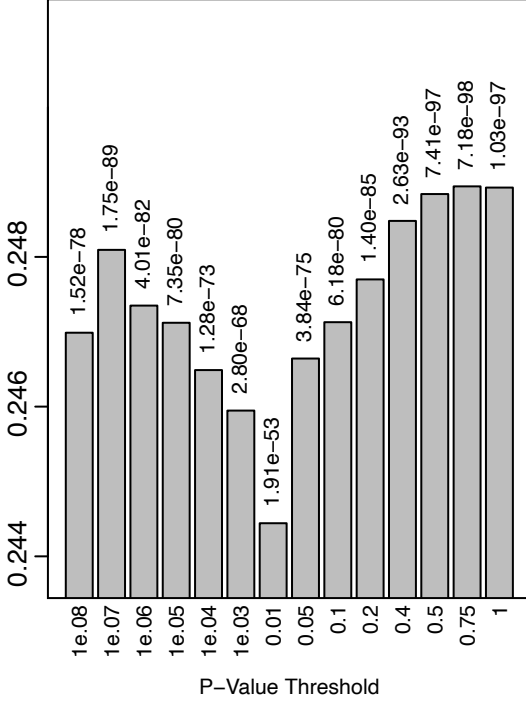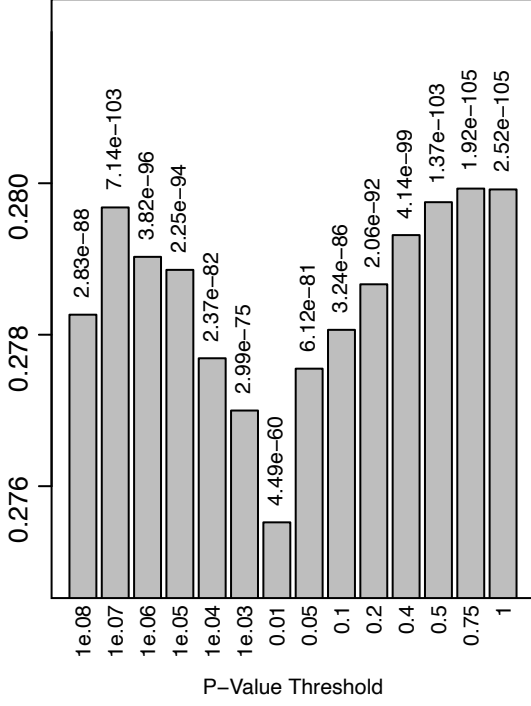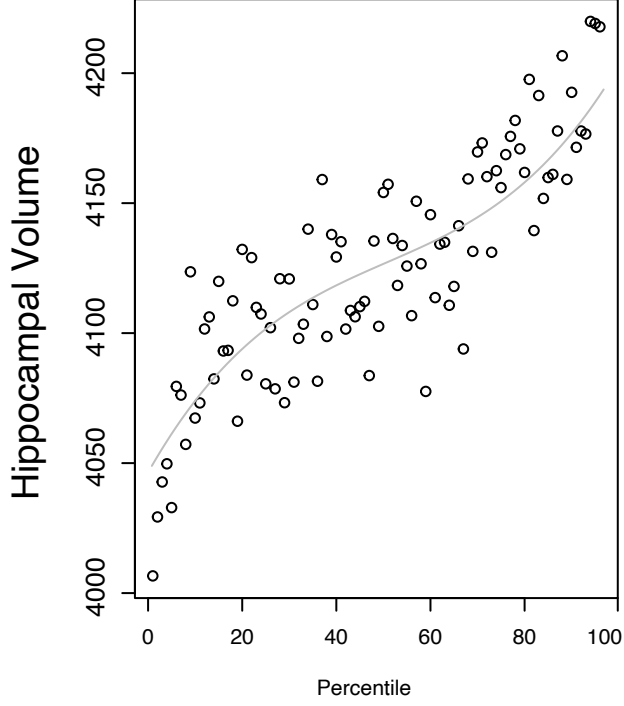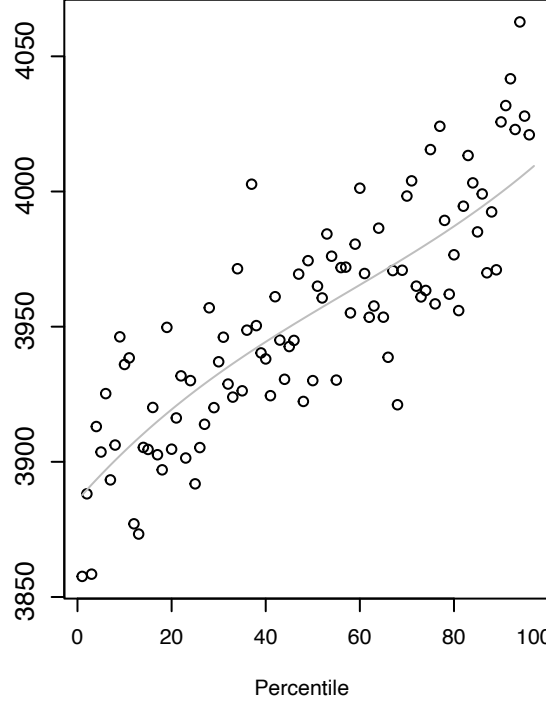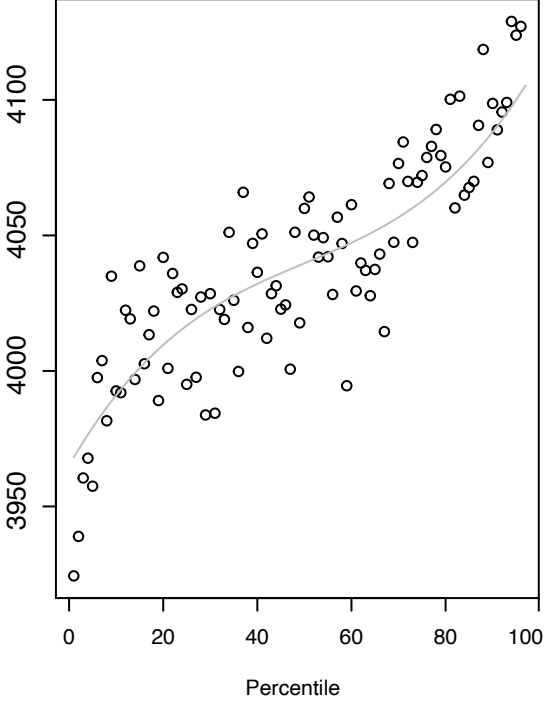

Supplement: supp [file elife-78232-supp-v1.zip]
