# Supplementary material for: Nomograms of human hippocampal volume shifted by polygenic scores
Source: eLife. 2022 Aug 8;11:e78232. doi: 10.7554/eLife.78232 (PMC9391046; doi:10.7554/eLife.78232)
Supplement: Figure 3—source data 1. [file elife-78232-fig3-data1.xlsx]

## Sheet: Sup Table 1
PRS THRESHOLD	MALE
	LEFT			RIGHT			BILATERAL
	Slope	P-Value	R2	Slope	P-Value	R2	Slope	P-Value	R2
1e-08	0.0679914	2.68333e-35	0.178425	0.0754902	1.40015e-35	0.179639	0.0841371	4.19445e-40	0.198972
1e-07	0.0754598	2.63891e-41	0.179823	0.0825147	1.96431e-40	0.180767	0.092645	2.93347e-46	0.20037
1e-06	0.0748395	2.25939e-38	0.179141	0.0813531	3.85012e-37	0.180002	0.0916036	1.04584e-42	0.199563
1e-05	0.0813771	1.37037e-37	0.178959	0.0885057	2.02188e-36	0.179834	0.0996322	7.47016e-42	0.199369
0.0001	0.0671298	6.99276e-29	0.176931	0.0775307	2.26658e-31	0.17866	0.0848062	4.3311e-34	0.197605
0.001	0.0695419	4.49335e-27	0.17651	0.0854648	4.40522e-33	0.179058	0.0908343	4.92502e-34	0.197593
0.01	0.0682551	3.80549e-27	0.176527	0.0783603	3.8128e-29	0.178142	0.0859557	7.86101e-32	0.197092
0.05	0.0745014	3.8578e-31	0.177457	0.0838799	3.12494e-32	0.17886	0.0928656	7.57089e-36	0.198005
0.1	0.0831839	1.5192e-38	0.179181	0.0926358	4.43816e-39	0.180452	0.103098	6.00745e-44	0.199845
0.2	0.0780929	2.30384e-37	0.178906	0.0897893	2.7989e-40	0.180731	0.0984227	5.41307e-44	0.199855
0.4	0.0800766	7.66192e-40	0.179483	0.0945445	3.21786e-45	0.181878	0.102355	3.11924e-48	0.200818
0.5	0.0818422	3.02029e-42	0.180042	0.0961487	1.67774e-47	0.182408	0.104334	6.65878e-51	0.201423
0.75	0.0810618	5.39315e-43	0.180217	0.0949014	5.05811e-48	0.182529	0.103148	1.26248e-51	0.201587
1	0.0804613	4.71663e-43	0.18023	0.0943205	3.29495e-48	0.182572	0.102455	9.15028e-52	0.201619
PRS THRESHOLD	FEMALE
1e-08	0.0801892	2.40652e-45	0.137453	0.0910437	1.82211e-46	0.131329	0.0945196	1.39665e-51	0.149079
1e-07	0.0948314	1.5232e-54	0.139472	0.104422	1.14363e-52	0.1327	0.110048	3.09865e-60	0.150954
1e-06	0.104223	3.90386e-53	0.139163	0.111253	2.62155e-48	0.131737	0.119075	6.47399e-57	0.150235
1e-05	0.100213	3.5737e-53	0.139171	0.105015	1.2076e-46	0.131369	0.113449	5.99075e-56	0.150026
0.0001	0.0905793	9.15905e-47	0.137765	0.100326	1.11142e-45	0.131156	0.105426	6.50054e-52	0.149151
0.001	0.0898807	3.35396e-40	0.136323	0.0963352	7.08239e-37	0.129207	0.102898	3.38128e-43	0.147261
0.01	0.0759867	1.06508e-27	0.133575	0.0828572	2.74843e-26	0.126862	0.0877452	3.25043e-30	0.144442
0.05	0.0820276	1.32854e-39	0.136192	0.100548	4.82222e-47	0.131457	0.100641	1.19561e-48	0.148444
0.1	0.0776709	1.16931e-36	0.135545	0.0963077	1.6978e-44	0.130894	0.0958823	1.5437e-45	0.147769
0.2	0.0846913	3.11173e-43	0.13699	0.101464	3.72527e-49	0.131924	0.102657	6.55764e-52	0.149151
0.4	0.0909028	3.60044e-45	0.137415	0.109965	2.41309e-52	0.132629	0.11075	8.54417e-55	0.149776
0.5	0.0947078	3.25323e-47	0.137864	0.113519	9.34108e-54	0.13294	0.114827	9.39928e-57	0.1502
0.75	0.0965933	1.21322e-48	0.138177	0.114393	4.16634e-54	0.133018	0.116374	9.16108e-58	0.150419
1	0.0967122	1.51804e-48	0.138156	0.114265	9.43971e-54	0.132939	0.116374	1.64671e-57	0.150364
PRS THRESHOLD	BOTH GENDERS
1e-08	0.067229	4.60147e-78	0.260849	0.073723	4.96088e-79	0.246706	0.080064	9.01927e-89	0.278043
1e-07	0.0792392	6.42598e-93	0.262324	0.0848728	8.17217e-90	0.247798	0.0932339	3.13962e-103	0.279446
1e-06	0.0859627	1.01196e-88	0.261908	0.0903643	1.17203e-82	0.247073	0.100186	1.01633e-96	0.278815
1e-05	0.0879102	3.76536e-88	0.261851	0.0915597	1.20108e-80	0.24687	0.101978	3.25056e-95	0.278669
0.0001	0.0724921	9.56829e-73	0.260321	0.0798677	2.52513e-74	0.246229	0.0865411	4.24733e-83	0.277492
0.001	0.0744591	4.26443e-65	0.25956	0.0832829	1.70057e-68	0.245638	0.0895893	1.75849e-75	0.276752
0.01	0.0679039	3.36448e-53	0.258375	0.074394	9.37893e-54	0.244143	0.0808289	2.35924e-60	0.27528
0.05	0.0733208	1.2073e-68	0.259913	0.084281	3.31321e-76	0.24642	0.0894934	6.92548e-82	0.277375
0.1	0.0756019	2.51033e-73	0.260378	0.0867822	3.38255e-81	0.246925	0.0922099	2.25912e-87	0.277908
0.2	0.0750678	9.28899e-79	0.260918	0.0861003	4.30843e-87	0.247522	0.0915199	8.48466e-94	0.278531
0.4	0.07878	6.76081e-83	0.261329	0.0919607	6.51353e-95	0.248313	0.0969444	1.39749e-100	0.279189
0.5	0.0822981	3.0343e-87	0.261761	0.0953853	1.63479e-98	0.248677	0.100891	4.2934e-105	0.279627
0.75	0.0836928	1.70891e-89	0.261984	0.0962651	1.49868e-99	0.248782	0.102188	5.85669e-107	0.279808
1	0.0838307	1.89291e-89	0.26198	0.0963753	2.10738e-99	0.248767	0.102329	7.53314e-107	0.279797
