# Supplementary material for: Nomograms of human hippocampal volume shifted by polygenic scores
Source: eLife. 2022 Aug 8;11:e78232. doi: 10.7554/eLife.78232 (PMC9391046; doi:10.7554/eLife.78232)
Supplement: Figure 5—source data 1. [file elife-78232-fig5-data1.xlsx]

## Sheet: Sup Table 2
			Full Nomogram							Genetically Adjusted Nomograms					Reduction in Difference
			All Samples		High PRS		Low PRS		difference	High PRS		Low PRS		difference
			mean	sd	mean	sd	mean	sd		mean	sd	mean	sd
CN	MALE	left	0.49	0.35	0.55	0.36	0.41	0.33	0.26	0.52	0.36	0.43	0.34	0.09
		right	0.41	0.29	0.48	0.3	0.3	0.24	0.18	0.46	0.3	0.32	0.25	0.14
		bilateral	0.43	0.31	0.53	0.35	0.32	0.28	0.21	0.5	0.35	0.35	0.29	0.15
	FEMALE	left	0.44	0.29	0.5	0.28	0.35	0.3	0.15	0.48	0.27	0.38	0.31	0.1
		right	0.35	0.3	0.36	0.29	0.34	0.21	0.02	0.33	0.29	0.37	0.32	0.04
		bilateral	0.4	0.29	0.43	0.28	0.33	0.33	0.1	0.4	0.28	0.36	0.33	0.04
	BOTH	left	0.46	0.32	0.52	0.31	0.38	0.31	0.14	0.5	0.31	0.4	0.32	0.1
		right	0.38	29%%	0.42	0.3	0.32	0.27	0.1	0.39	0.3	0.34	0.28	0.05
		bilateral	0.41	0.31	0.48	0.31	0.33	0.3	0.15	0.45	0.31	0.36	0.31	0.09	0.06
MCI	MALE	left	0.29	0.32	0.42	0.34	0.16	0.25	0.26	0.4	0.33	0.17	0.26	0.23
		right	0.27	0.29	0.41	0.32	0.12	0.17	0.29	0.38	0.31	0.14	0.18	0.24
		bilateral	0.27	0.31	0.42	0.33	0.12	0.2	0.3	0.39	0.32	0.13	0.21	0.26
	FEMALE	left	0.31	0.31	0.38	0.32	0.23	0.29	0.15	0.37	0.32	0.26	0.29	0.11
		right	0.24	0.27	0.33	0.38	0.16	0.24	0.17	0.3	0.27	0.18	0.25	0.12
		bilateral	0.27	0.29	0.35	0.3	0.19	0.27	0.16	0.33	0.29	0.22	0.28	0.11
	BOTH	left	0.3	0.32	0.41	0.33	0.19	0.27	0.22	0.38	0.32	0.21	0.28	0.17
		right	0.26	0.28	0.37	0.3	0.14	0.21	0.23	0.35	0.29	0.16	0.22	0.19
		bilateral	0.25	0.29	0.39	0.32	0.15	0.24	0.24	0.36	0.31	0.17	0.25	0.19	0.05
AD	MALE	left	0.02	0.06	0.007	0.01	0.04	0.07	0.033	0.006	0.009	0.04	0.08	0.034
		right	0.01	0.03	0.03	0.06	0.008	0.01	0.022	0.03	0.05	0.009	0.01	0.021
		bilateral	0.01	0.016	0.007	0.01	0.012	0.018	0.005	0.006	0.008	0.013	0.022	0.007
	FEMALE	left	0.06	0.14	0.12	0.19	0.01	0.02	0.11	0.1	0.17	0.01	0.03	0.09
		right	0.07	0.2	0.13	0.27	0.007	0.015	0.123	0.12	0.24	0.01	0.02	0.11
		bilateral	0.06	0.18	0.12	0.23	0.001	0.003	0.119	0.1	0.21	0.002	0.005	0.098
	BOTH	left	0.04	0.11	0.07	0.15	0.03	0.06	0.04	0.05	0.13	0.03	0.06	0.02
		right	0.04	0.14	0.09	0.21	0.007	0.013	0.083	0.08	0.19	0.009	0.016	0.071
		bilateral	0.04	0.1	0.06	0.12	0.007	0.01	0.053	0.05	0.11	0.008	0.01	0.042	0.011
