# Supplementary material for: Nomograms of human hippocampal volume shifted by polygenic scores
Source: eLife journal article supplement (doi:10.7554/elife.78232), 2022-08-08
Supplement: supp [file elife-78232-supp-v1.zip]

UNSTRATIFIED

FEMALE

MALE

AGE BIN (YEARS)

AGE BIN (YEARS)

AGE BIN (YEARS)

HIGH PGS

LOW PGS

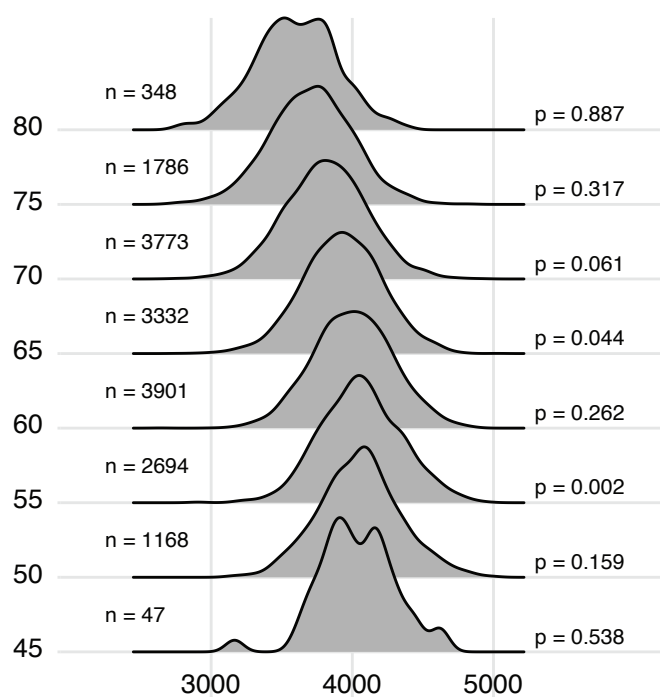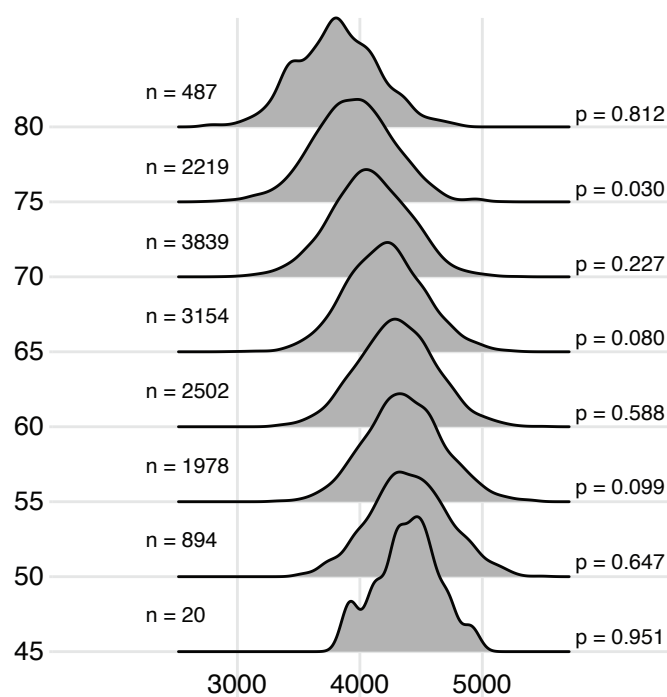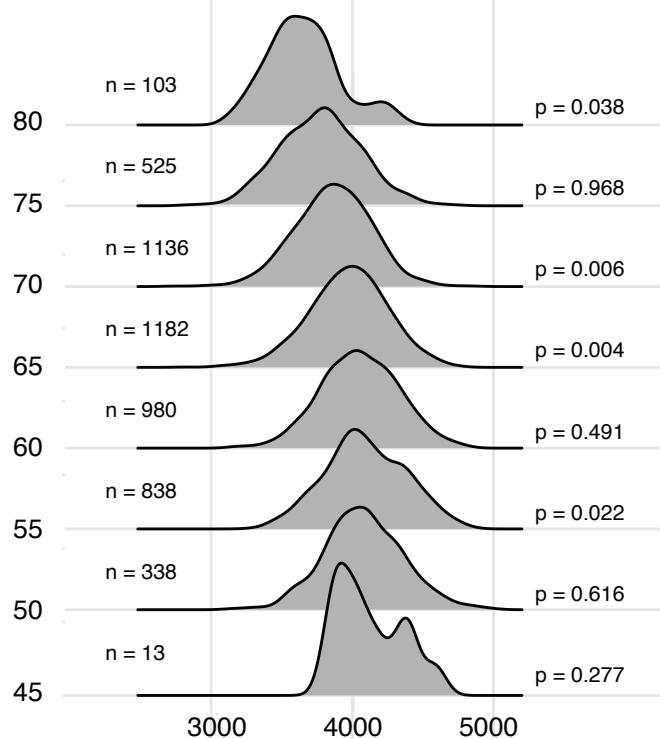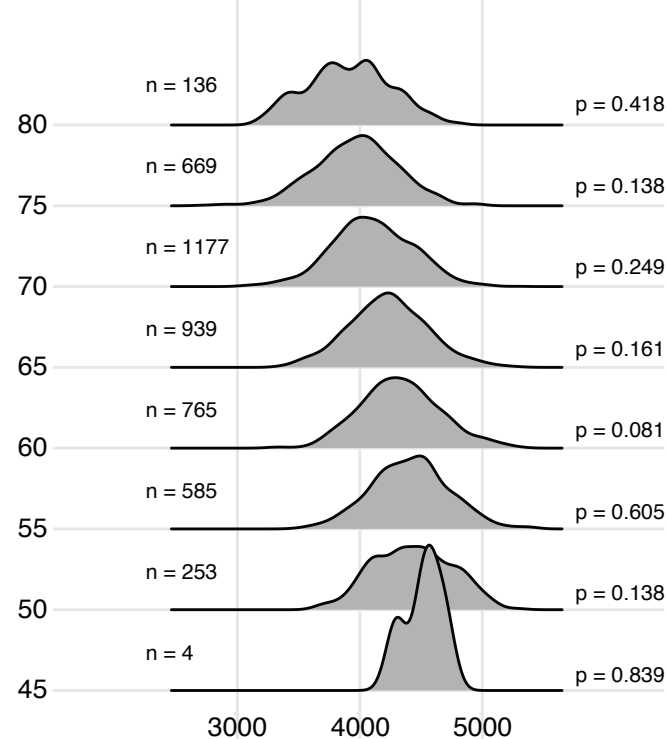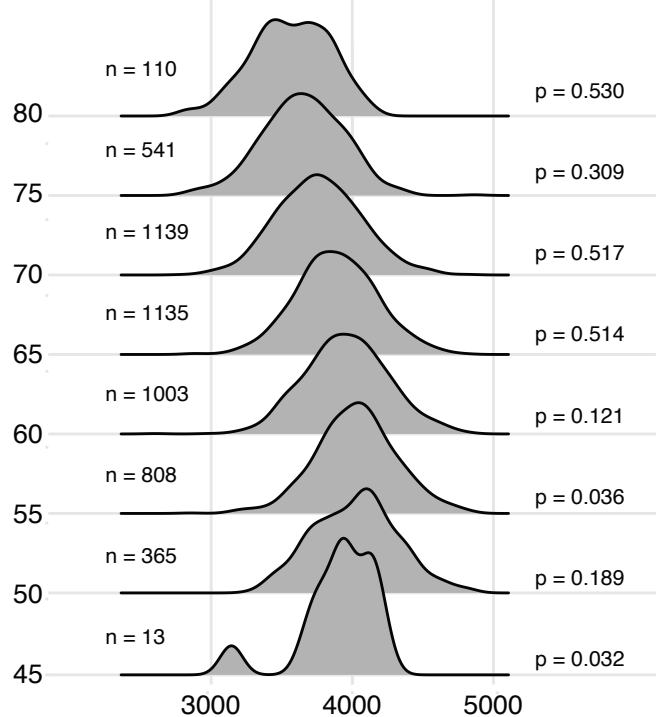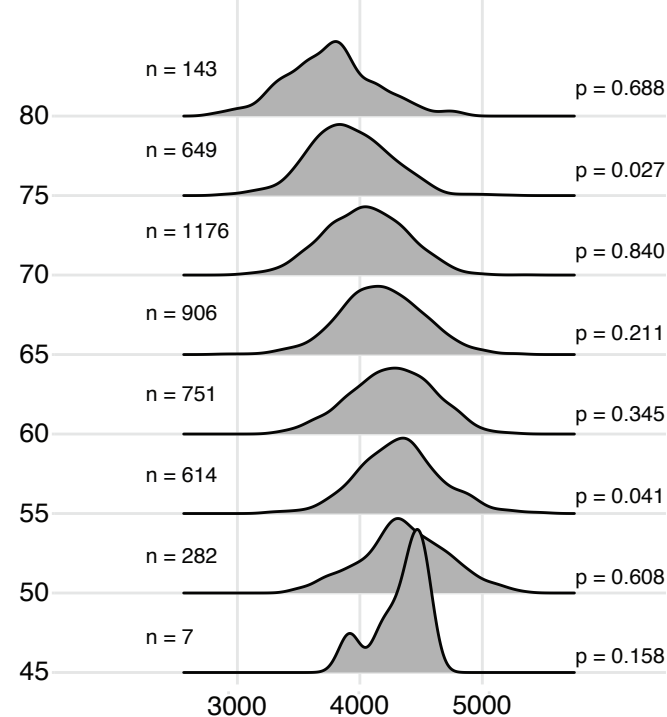HIPPOCAMPAL VOLUME  
(MM3)HIPPOCAMPAL VOLUME  
(MM3)
