# Supplementary figures and images for: Nomograms of human hippocampal volume shifted by polygenic scores
Source: eLife journal article supplement (doi:10.7554/elife.78232), 2022-08-08

# MALE BILATERAL HV

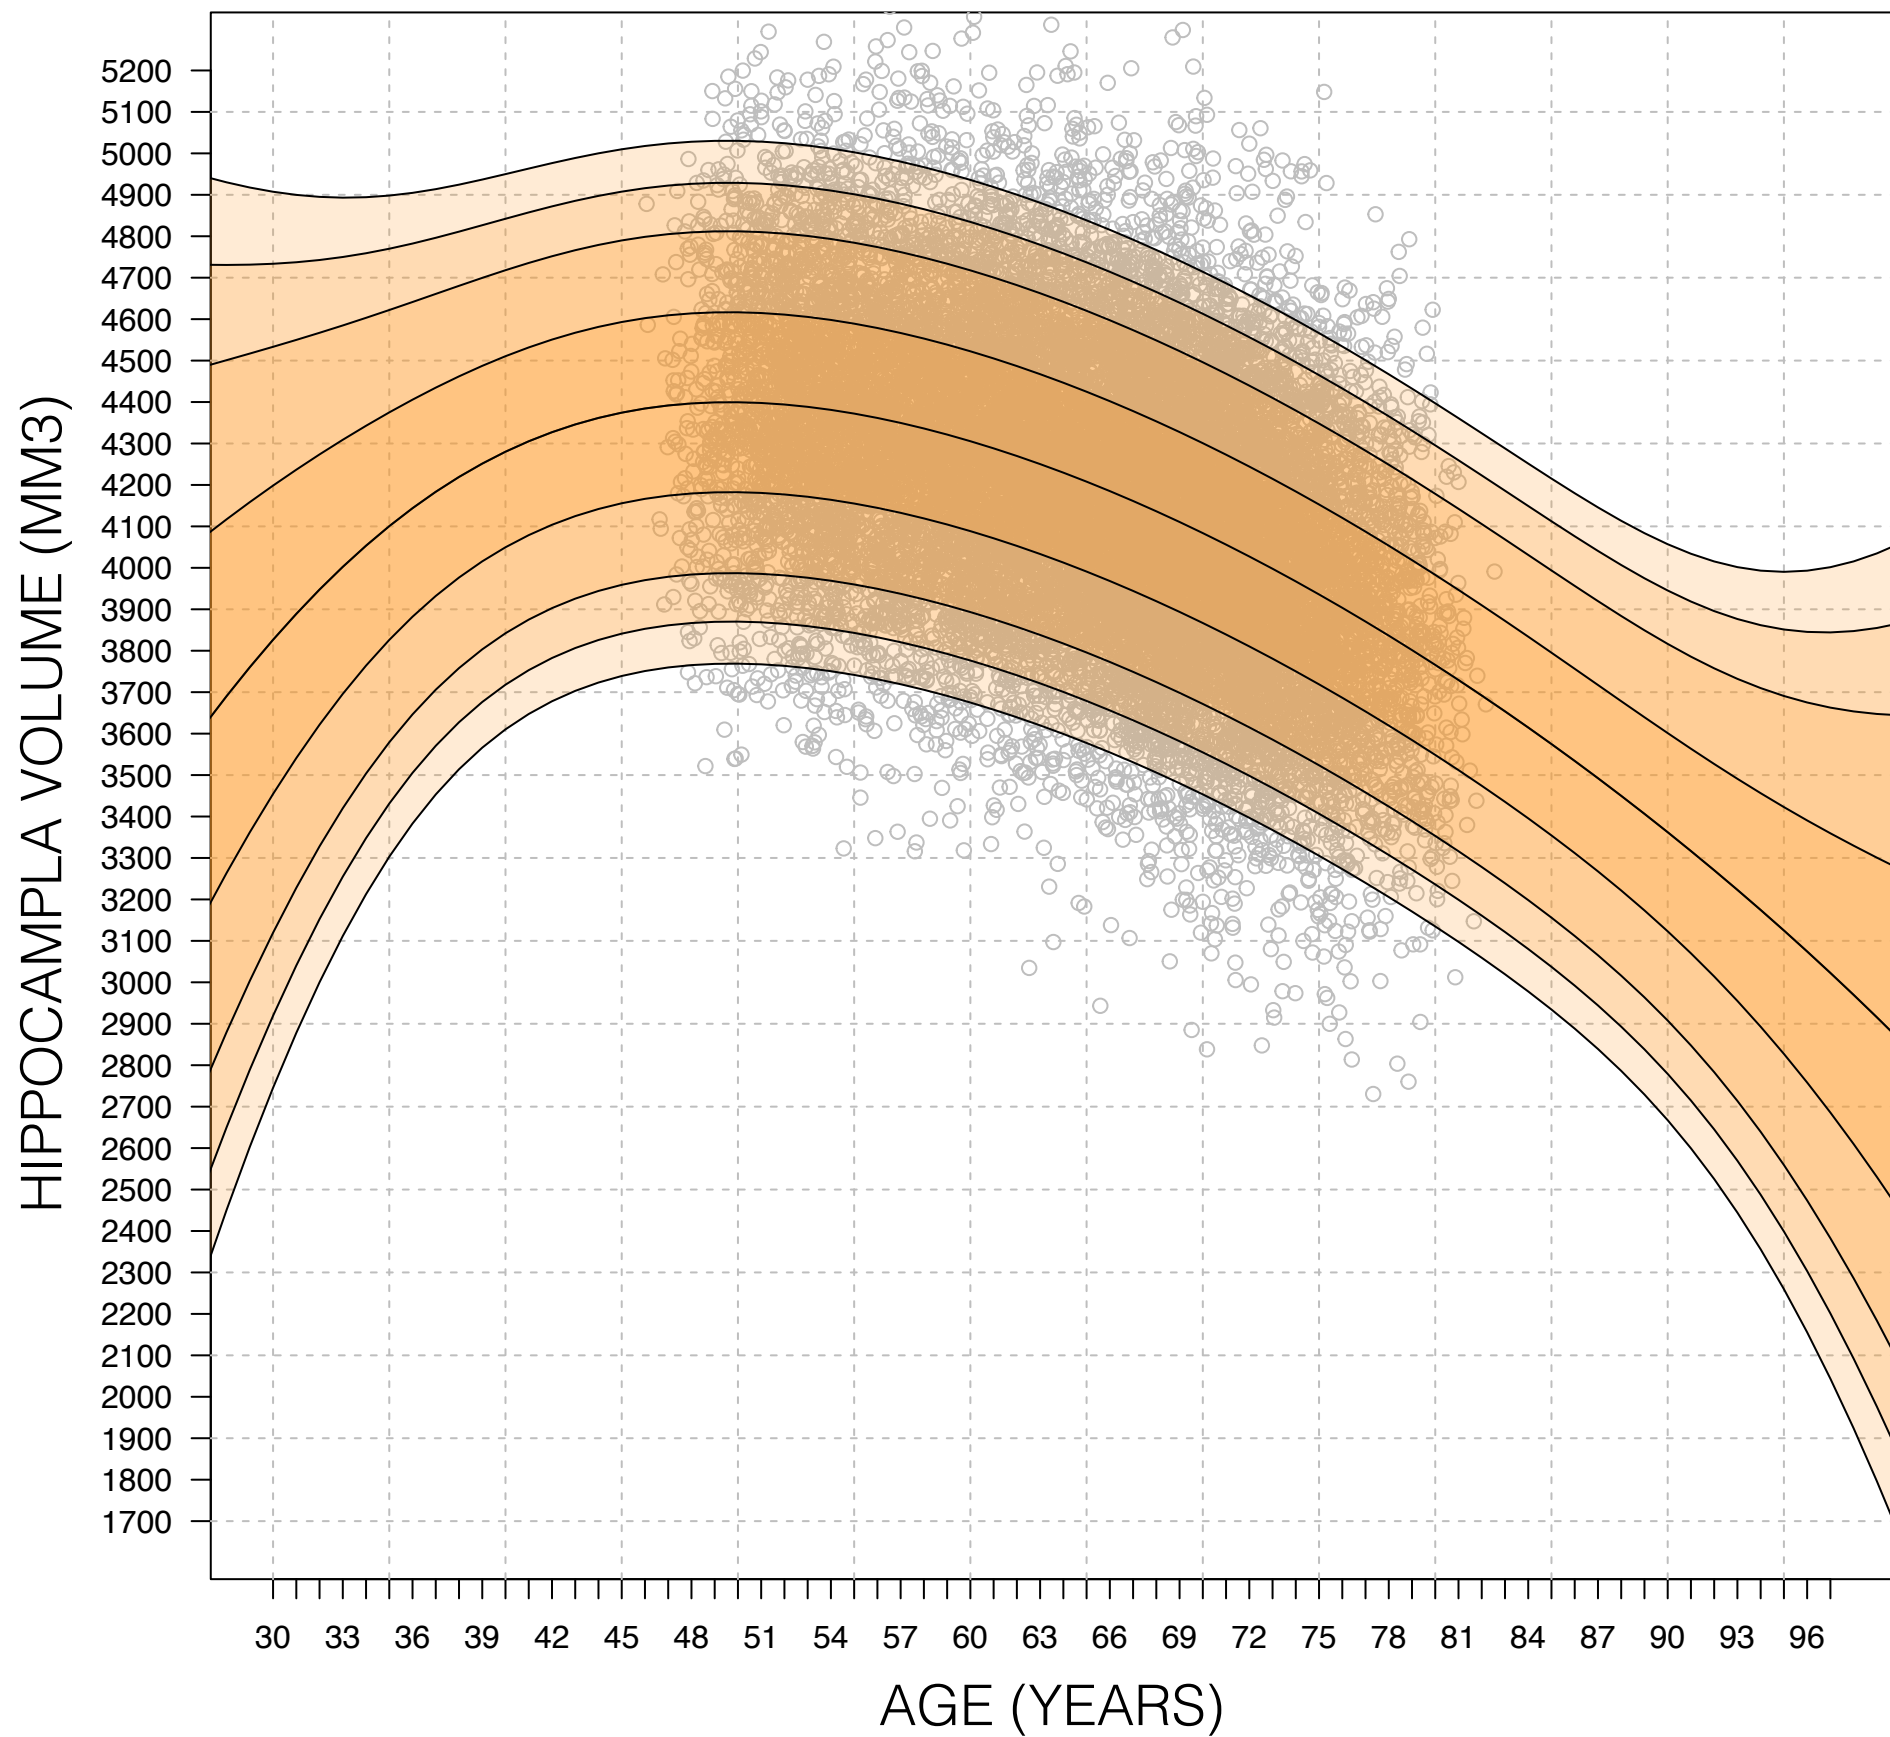

Supplement: supp [file elife-78232-supp-v1.zip]

# MALE BILATERAL

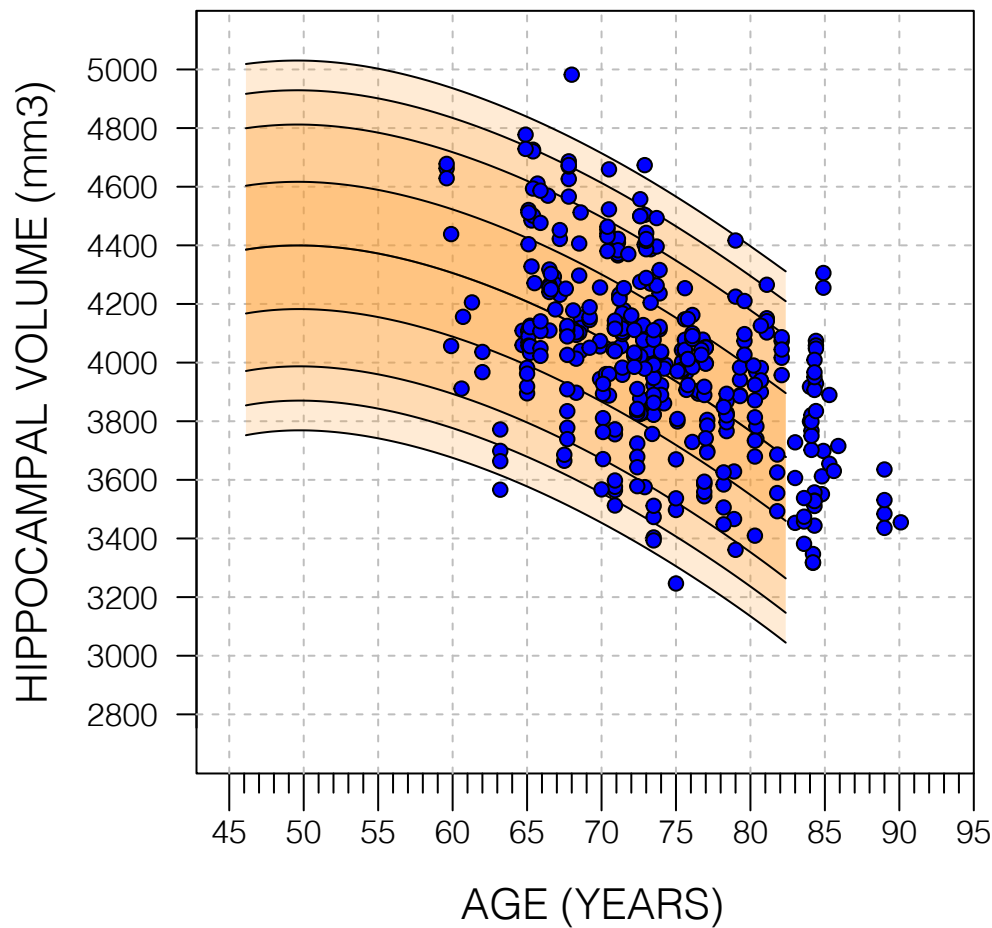

# FEMALE BILATERAL

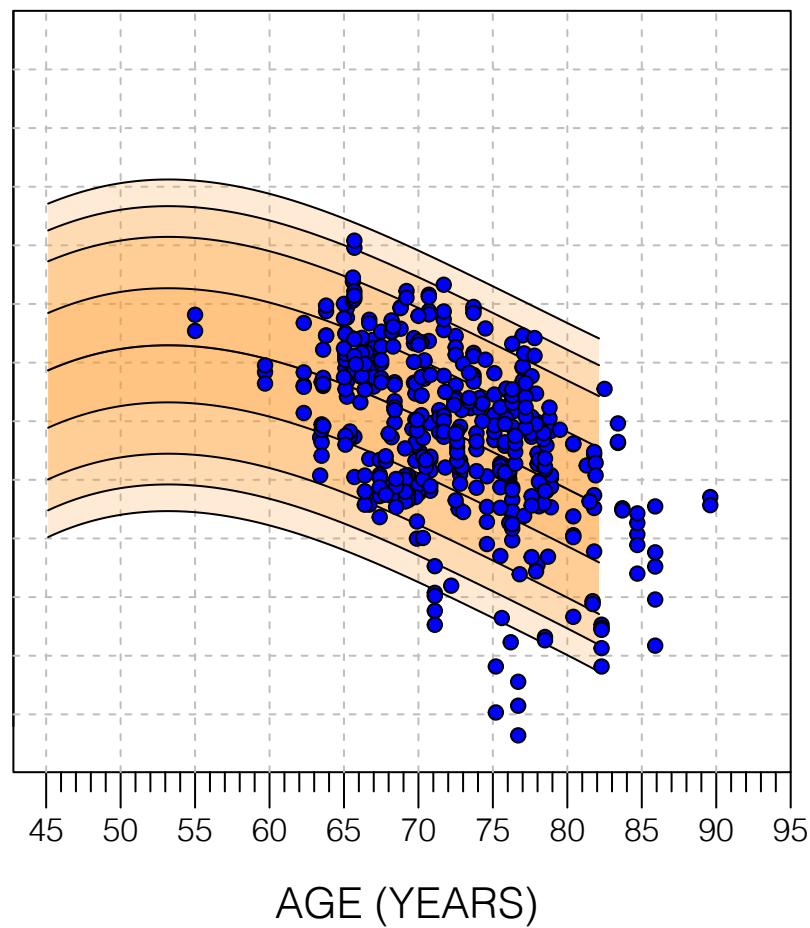

Supplement: supp [file elife-78232-supp-v1.zip]

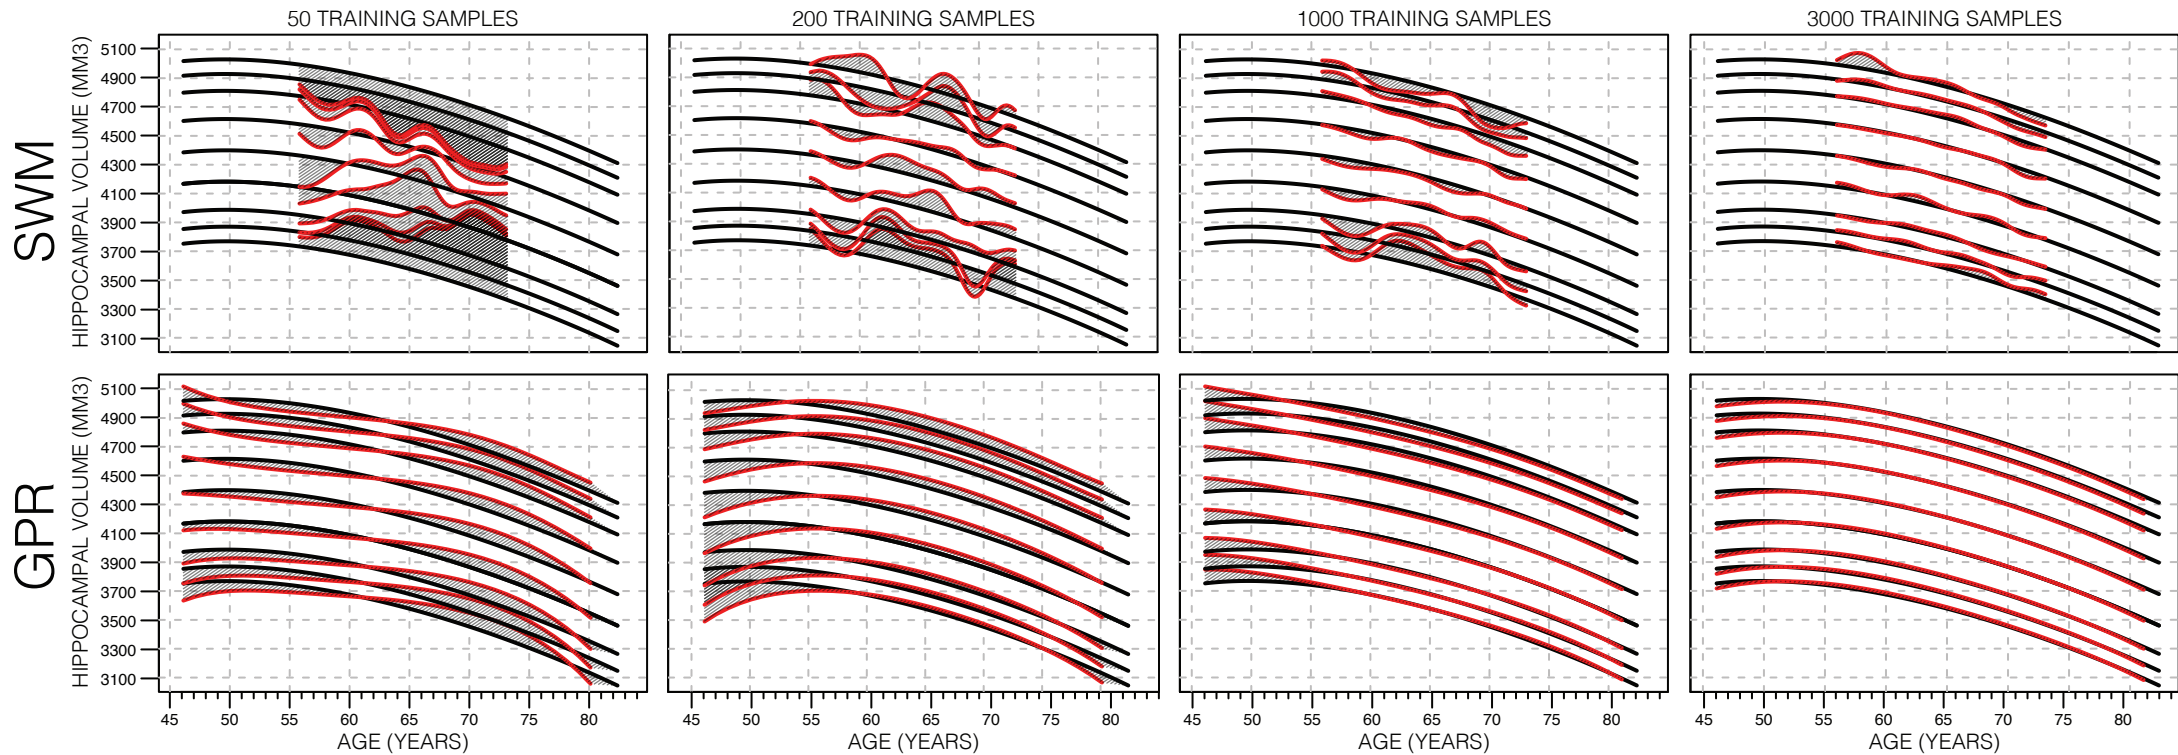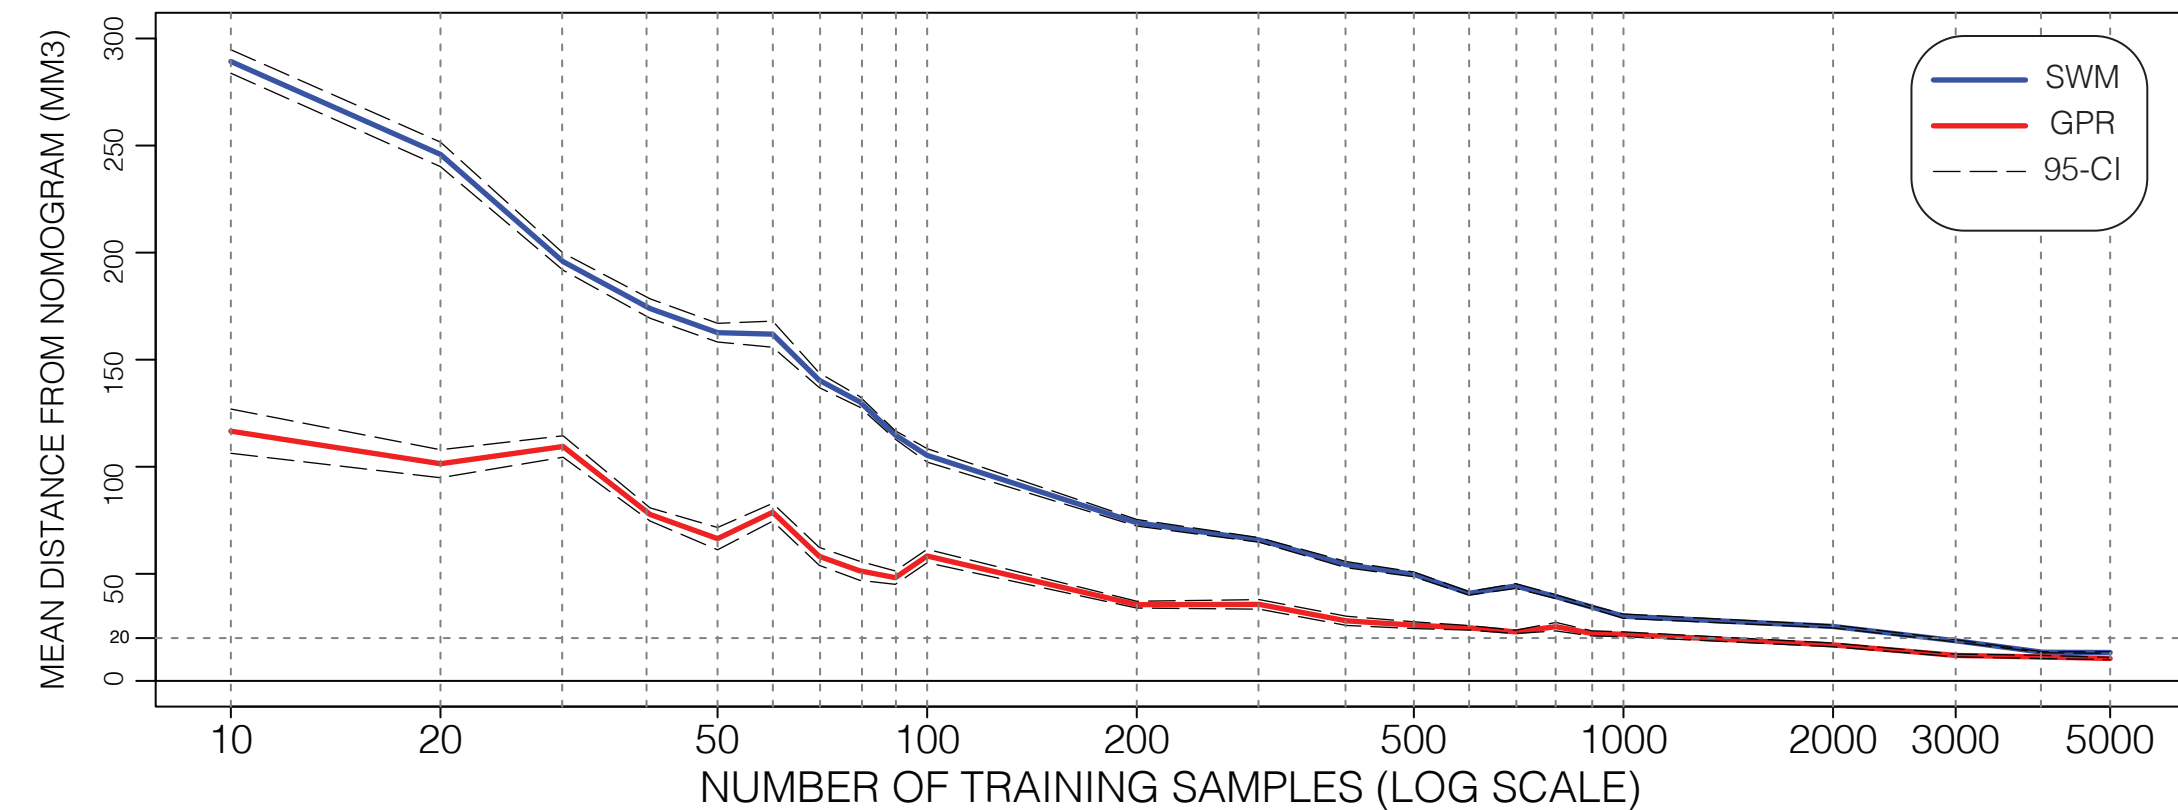

Supplement: supp [file elife-78232-supp-v1.zip]

HIGH PGS

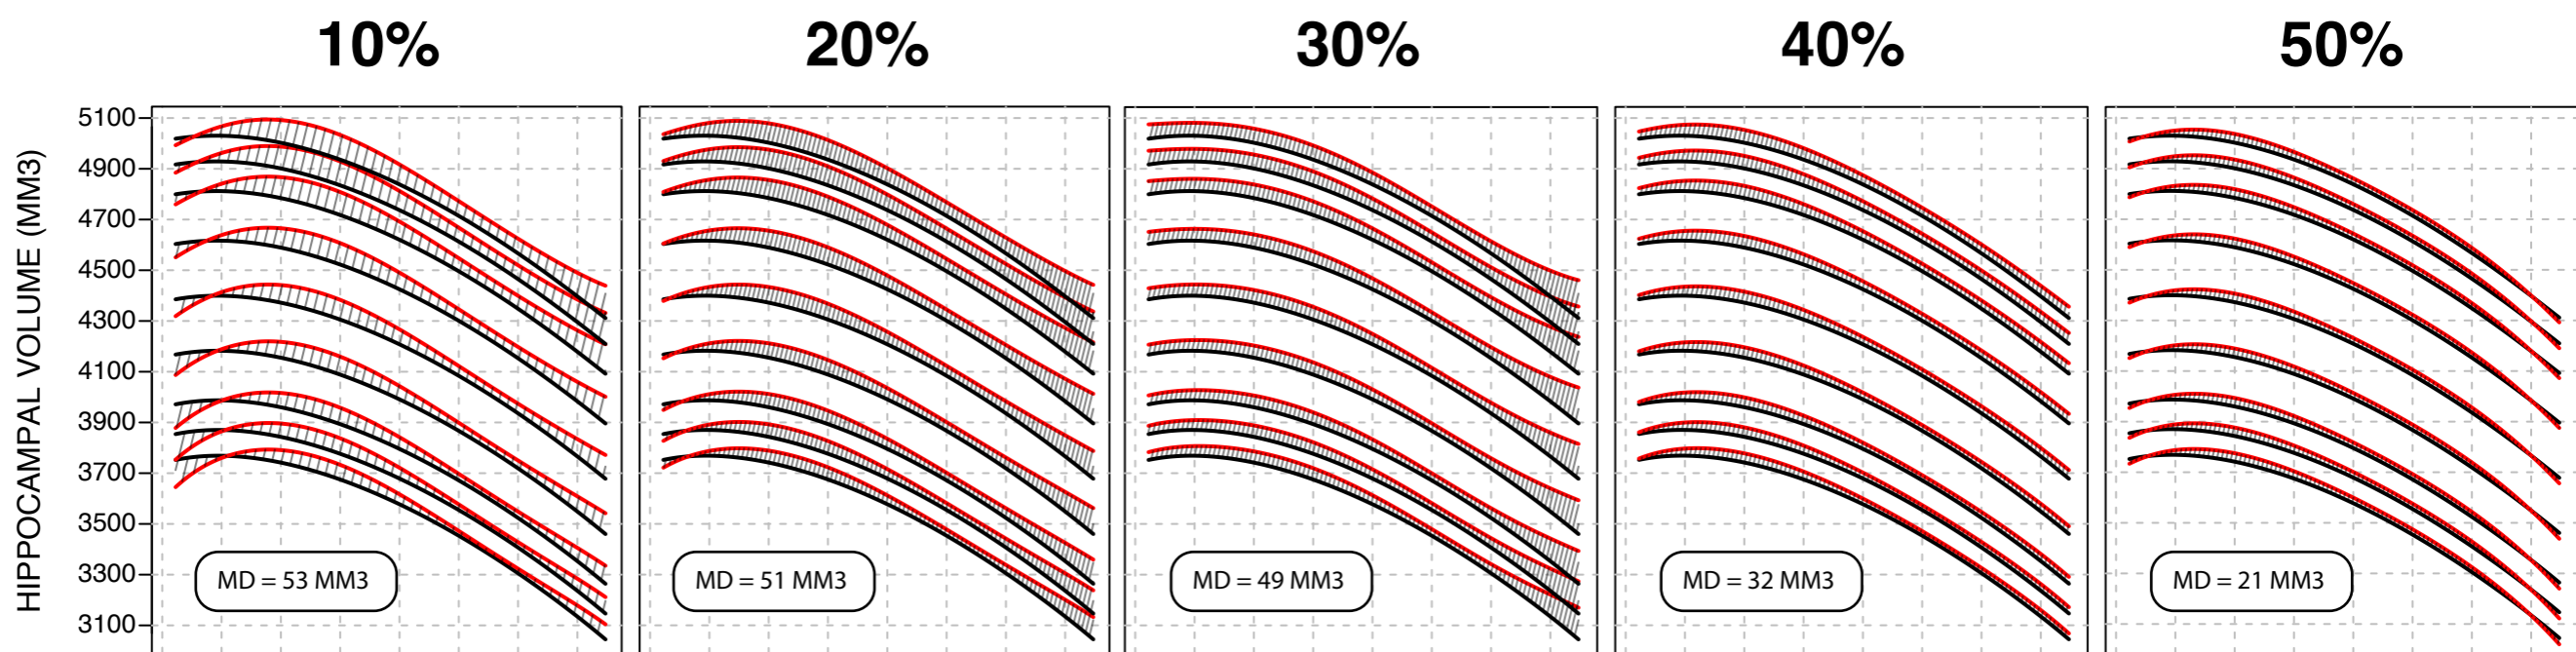

LOW PGS

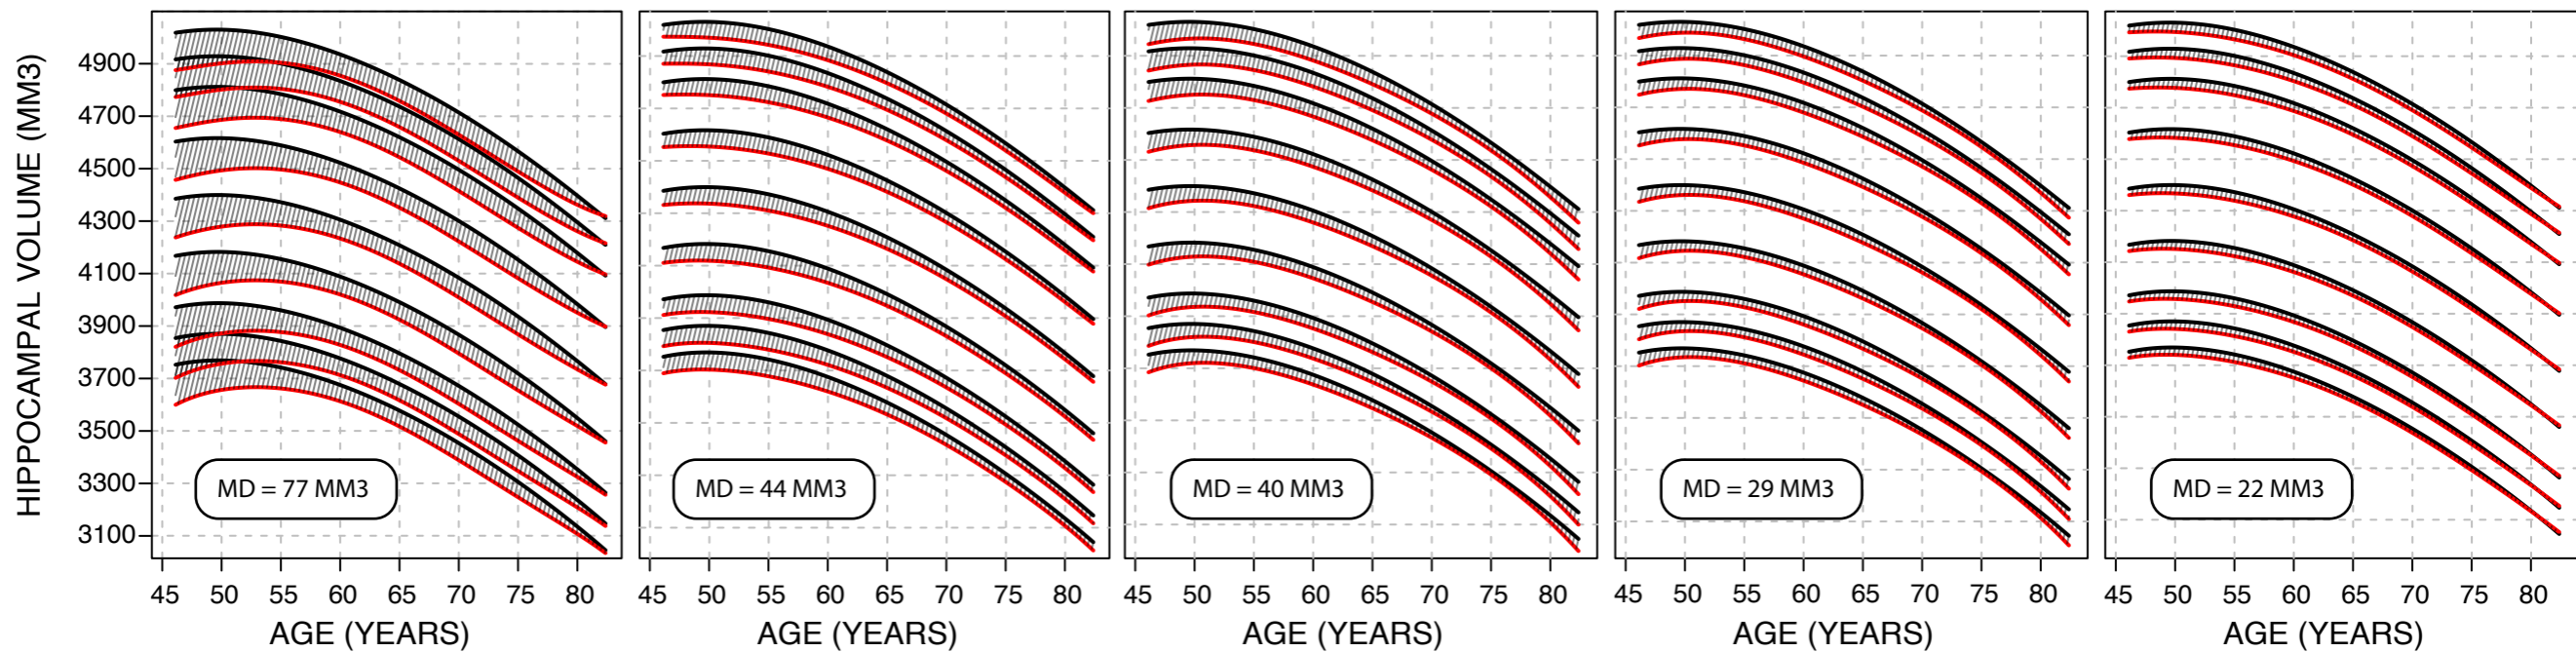

Supplement: supp [file elife-78232-supp-v1.zip]

HIGH PGS

HV

ICV

AD

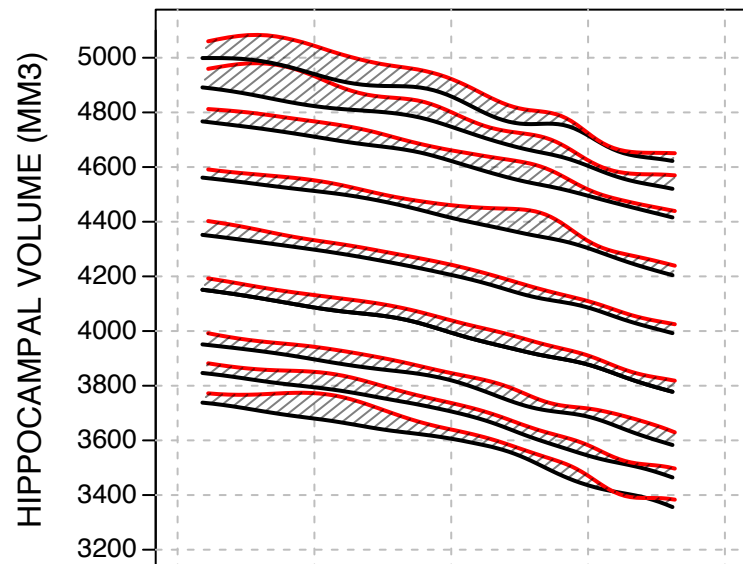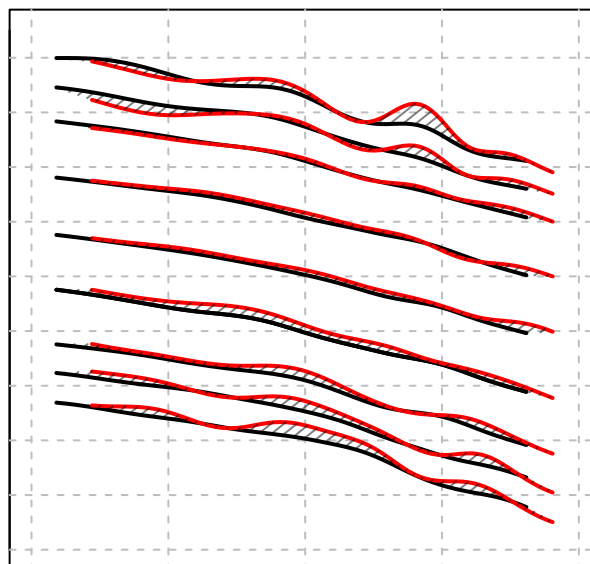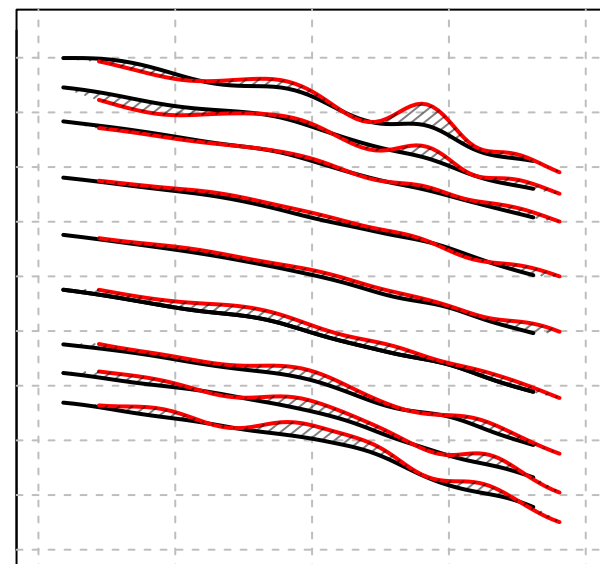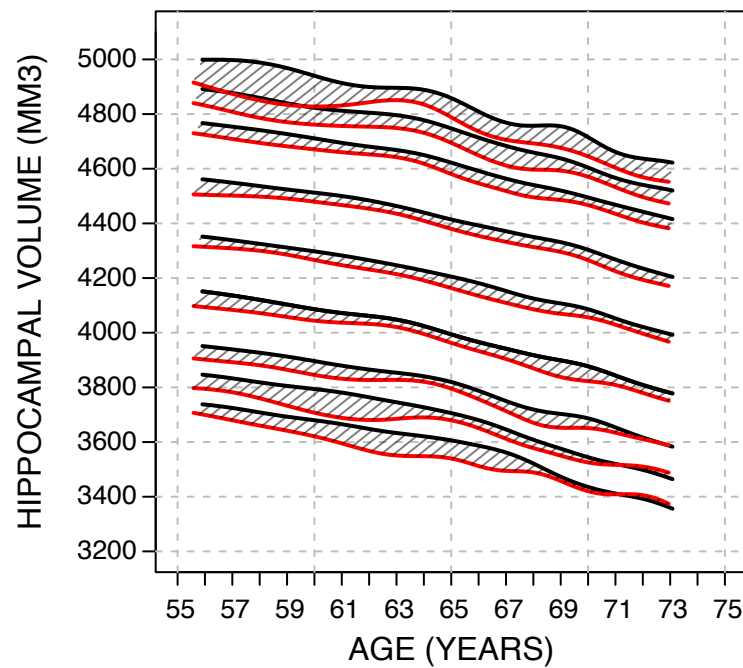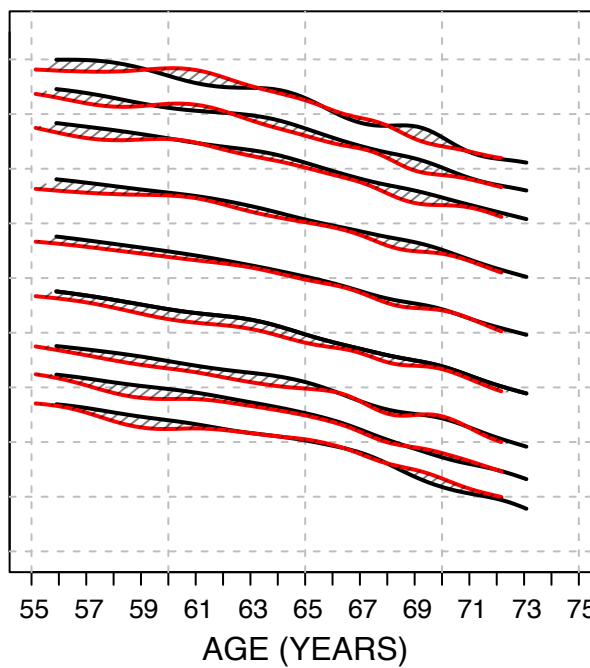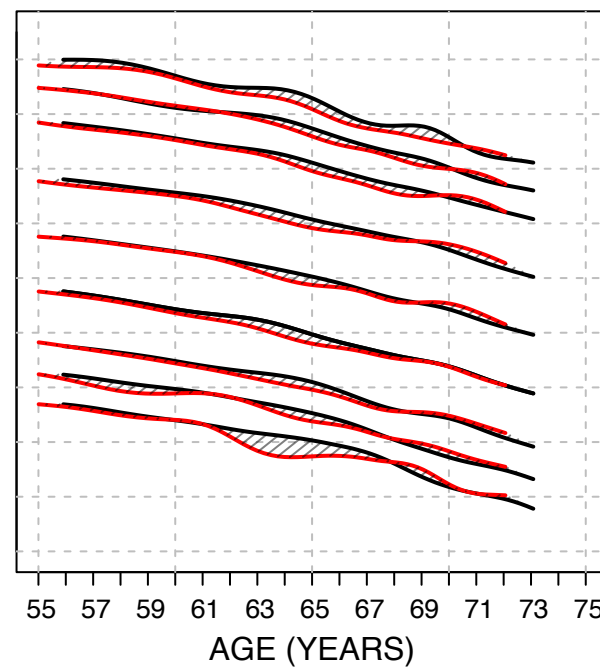

Supplement: supp [file elife-78232-supp-v1.zip]

LEFT

RIGHT

BILATERAL

MALE

FEMALE

UNSTRATIFIED

HIGH PGS

LOW PGS

UNSTRATIFIED

HIGH PGS

LOW PGS

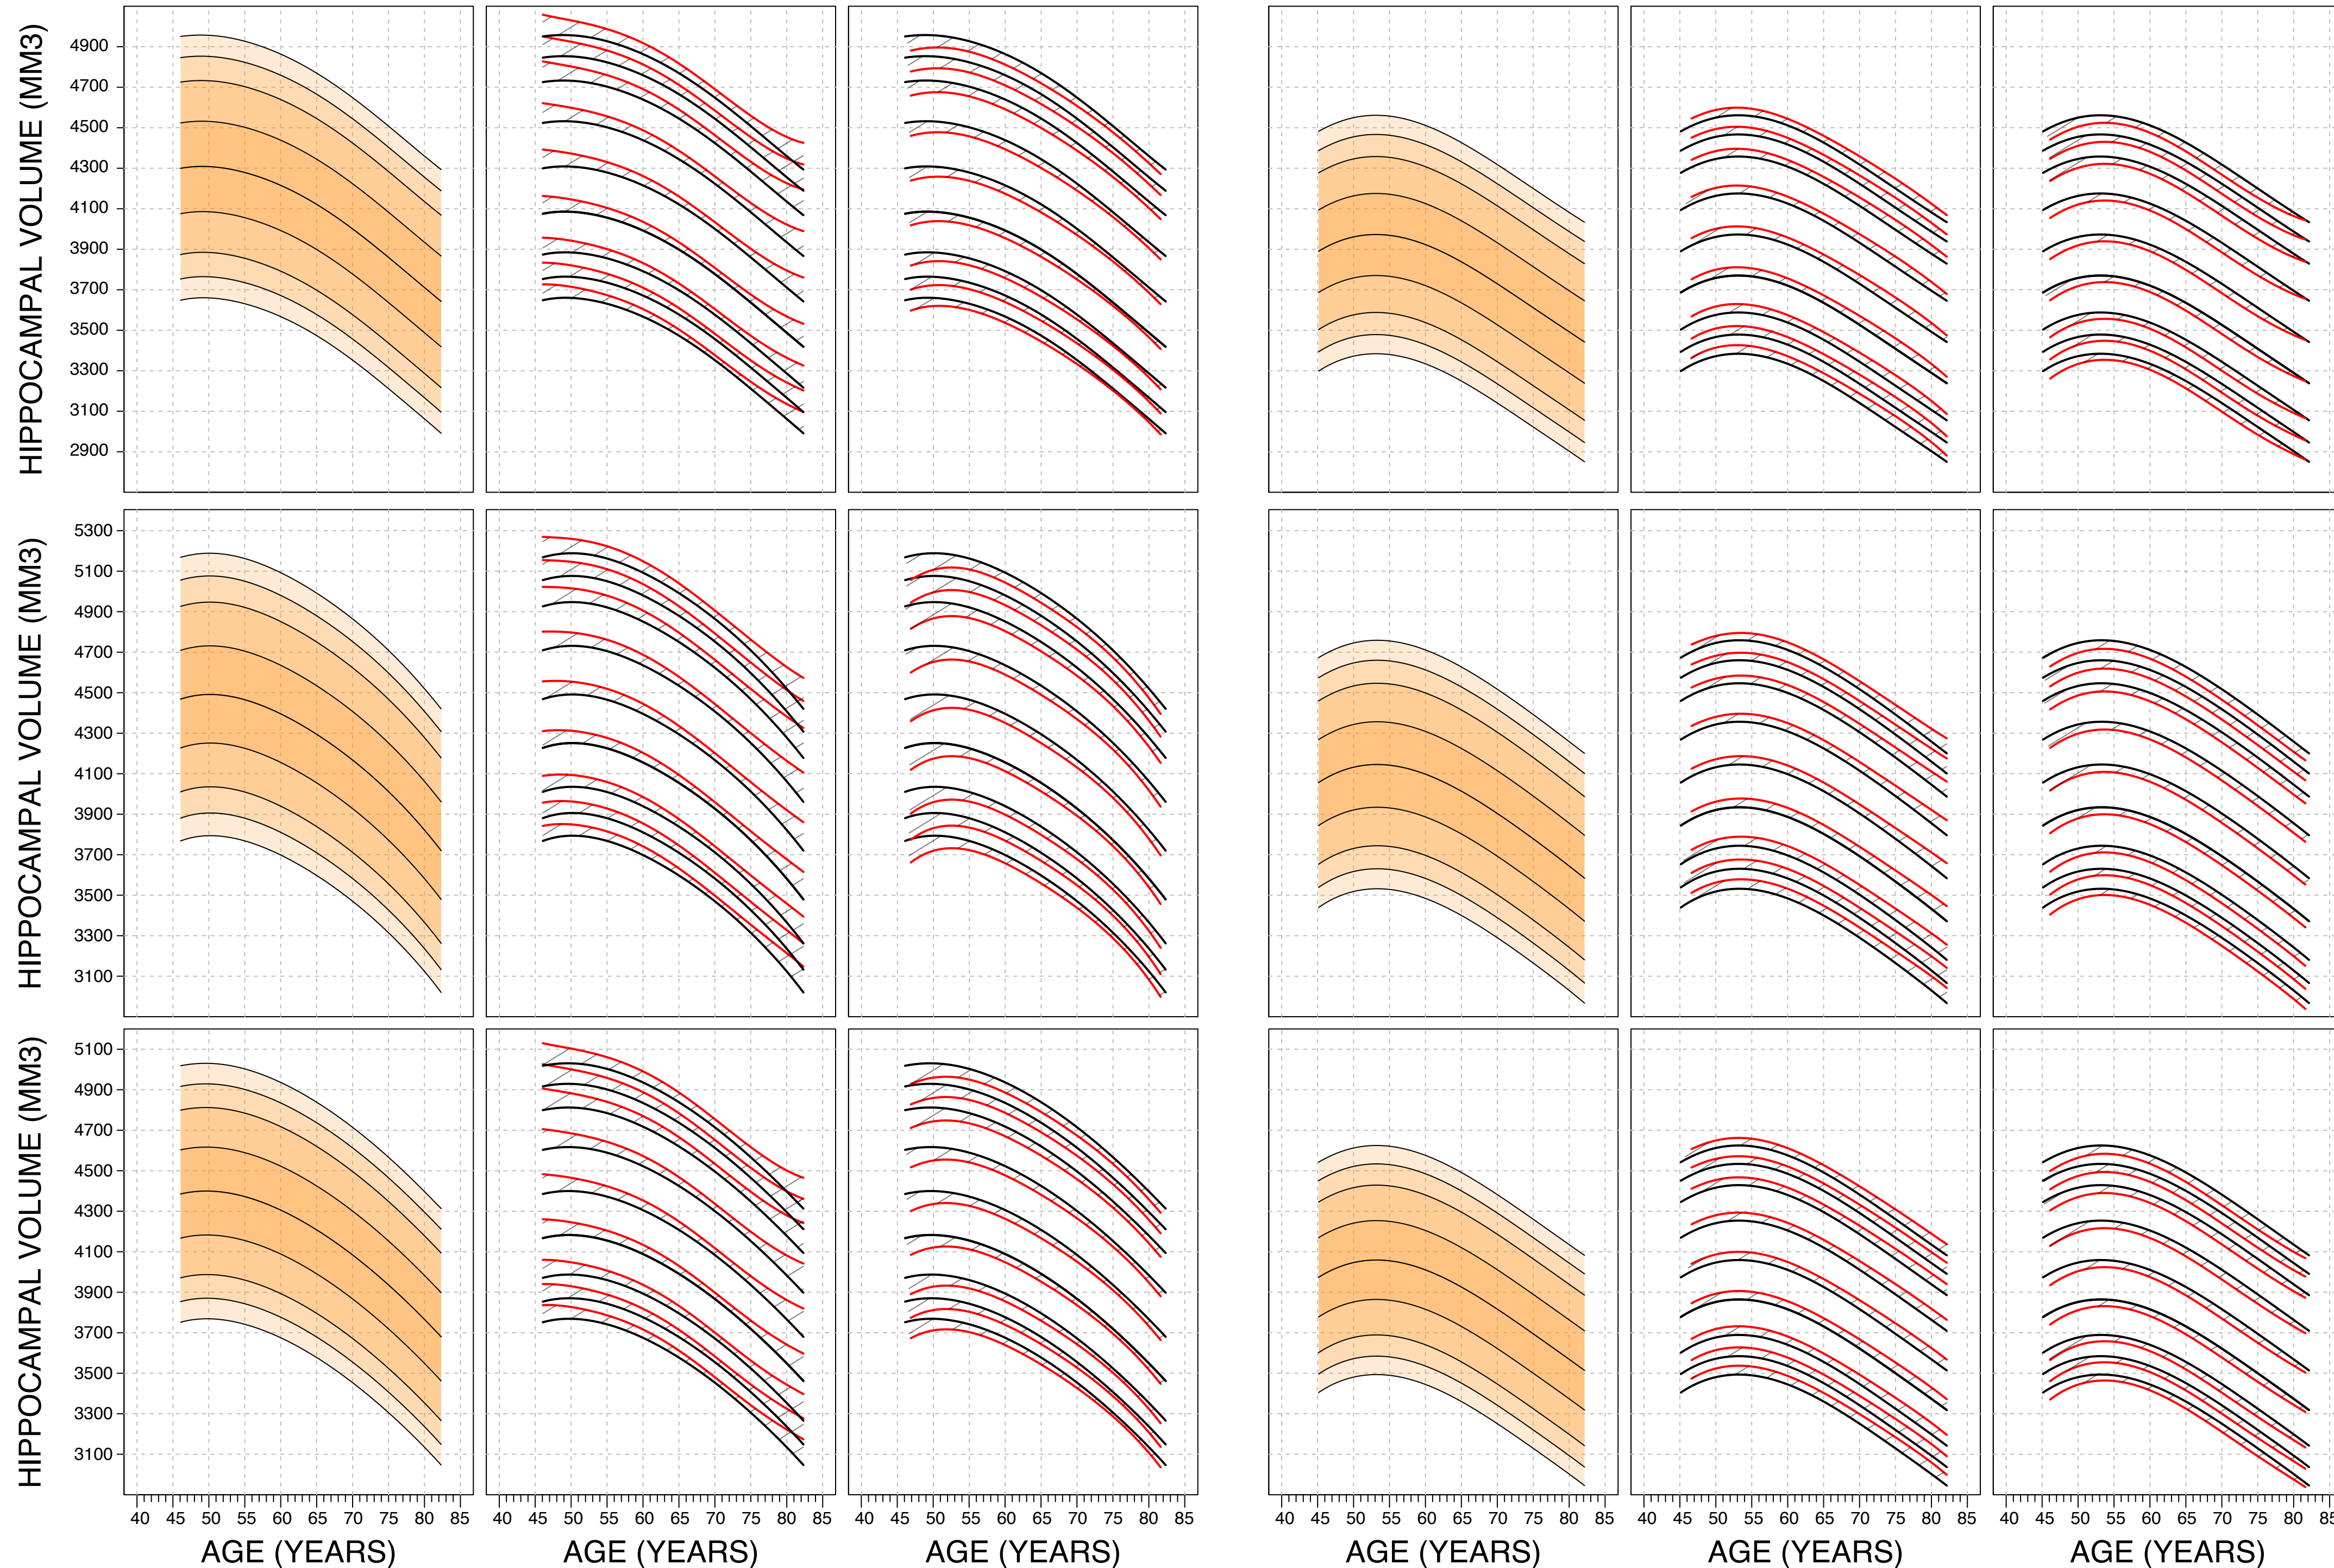

Supplement: supp [file elife-78232-supp-v1.zip]

R-Squared across P-Value Thresholds

HV across max R-Squared PRS Percentiles

Male

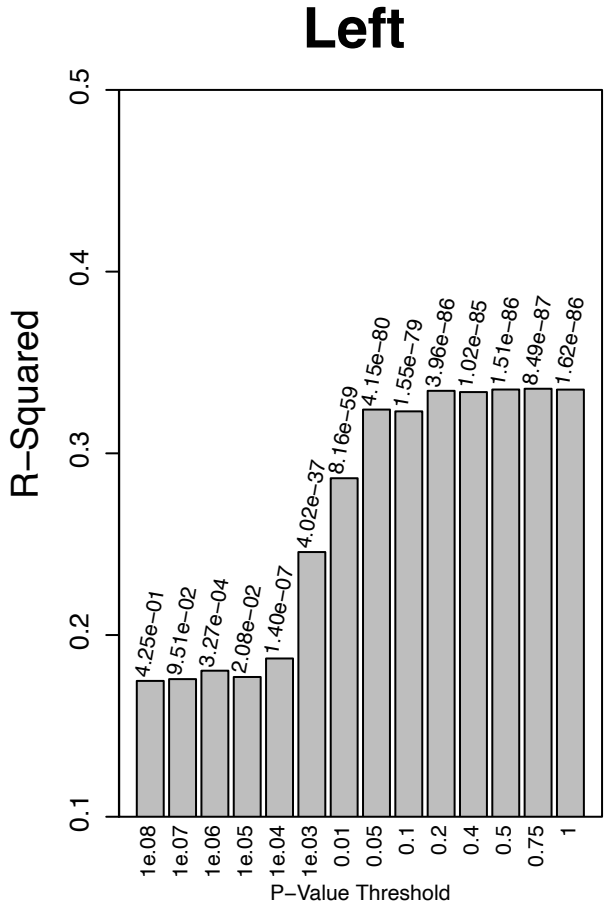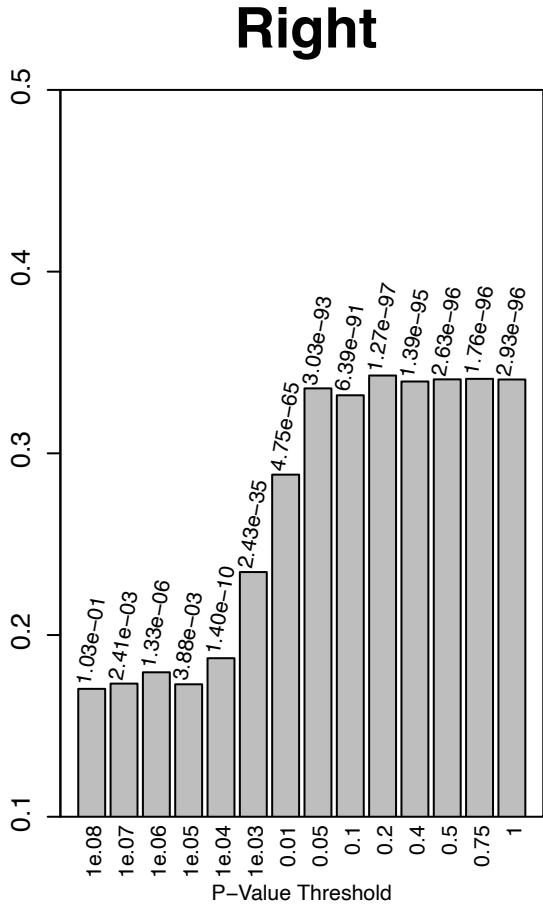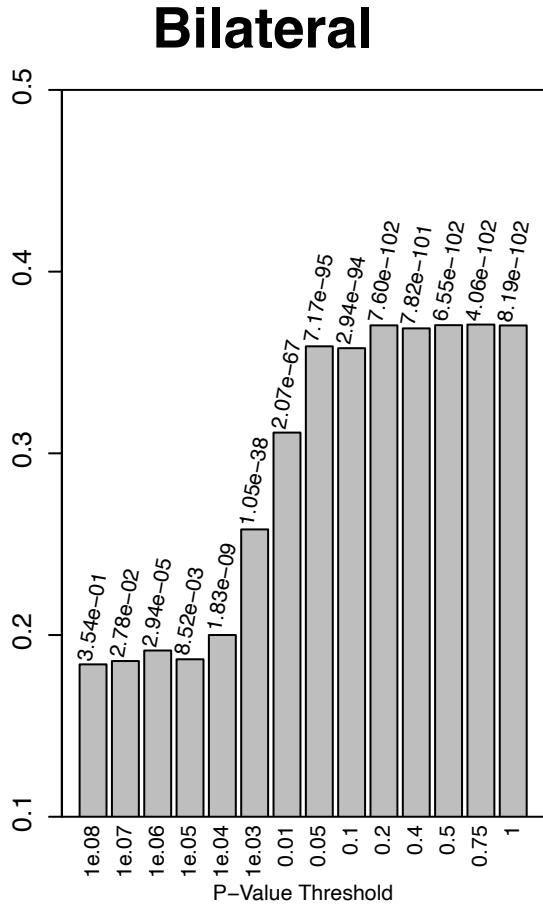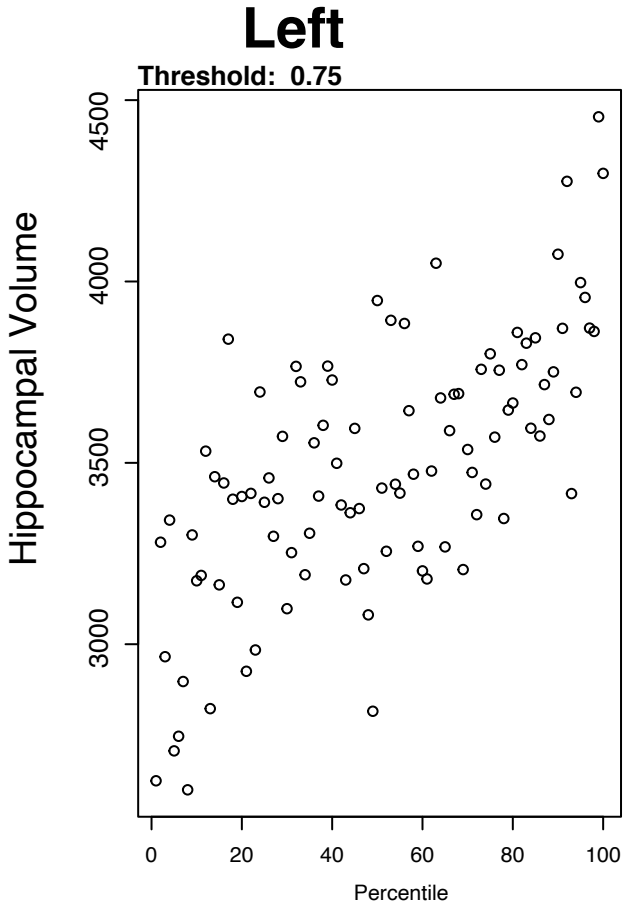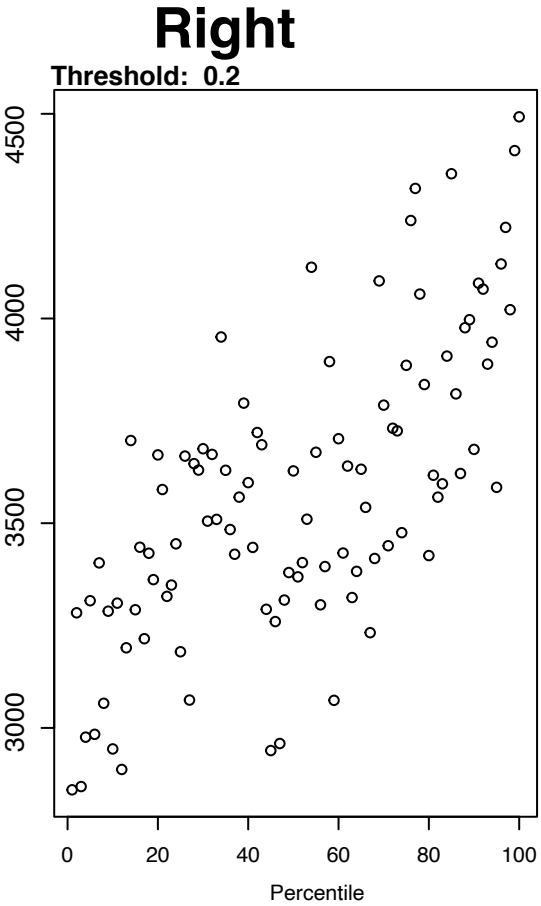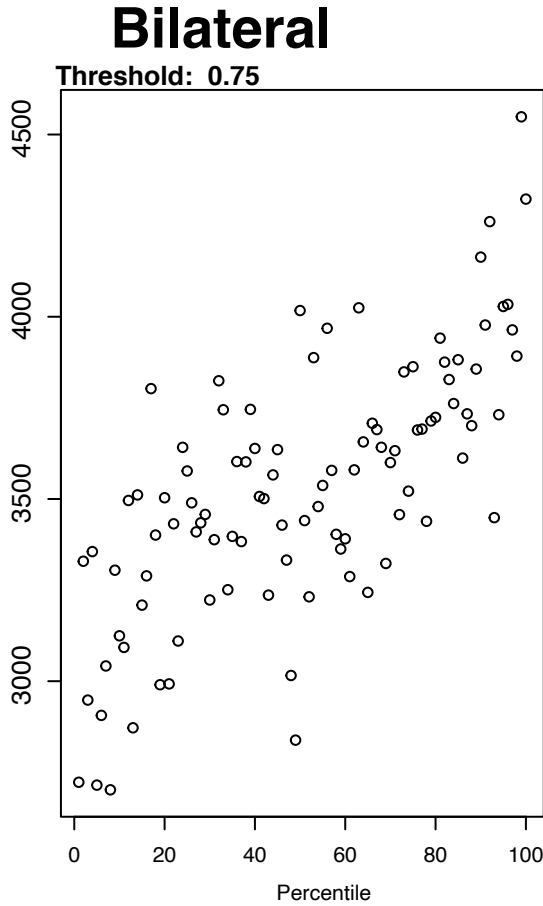

Female

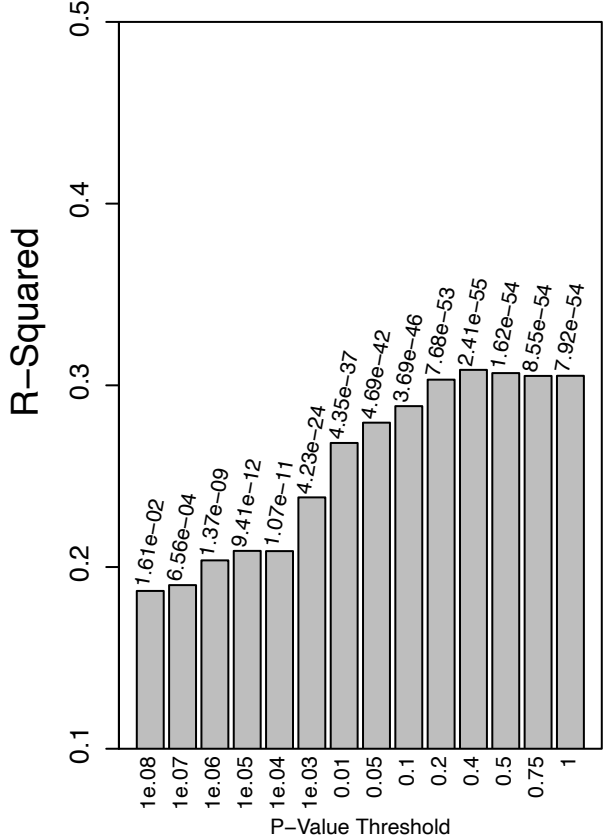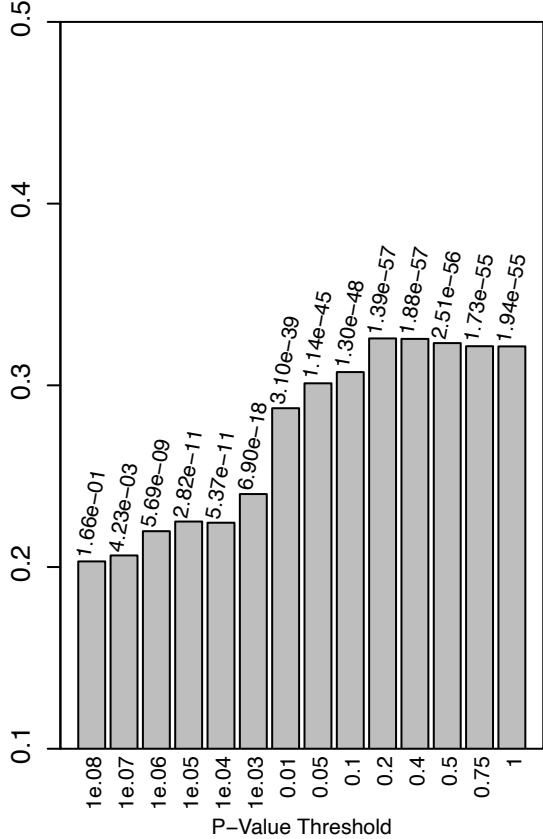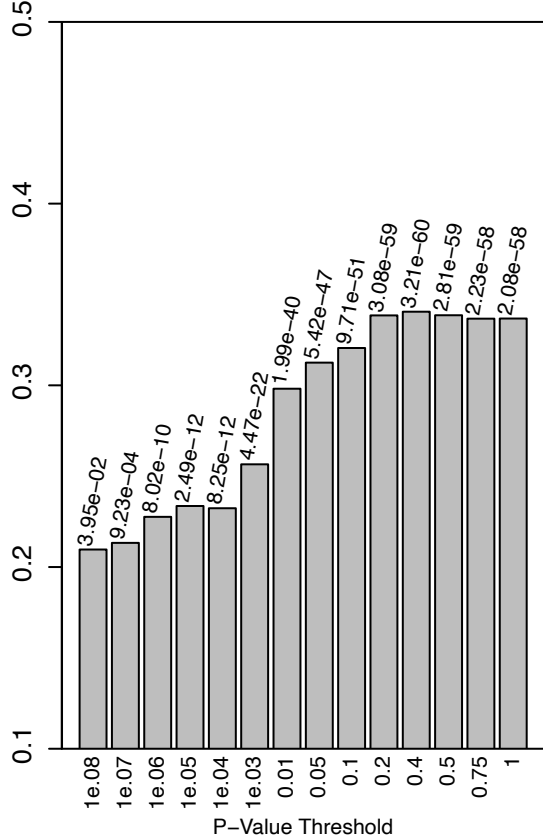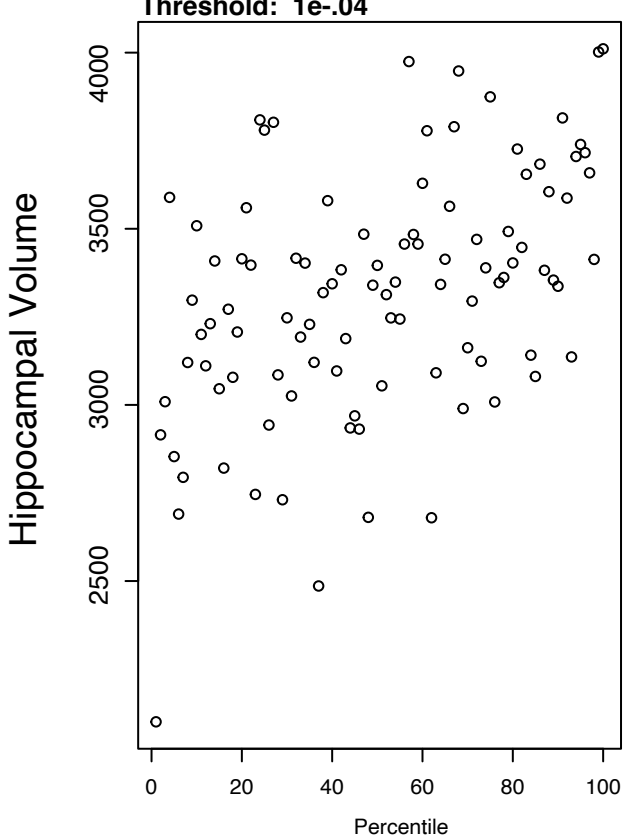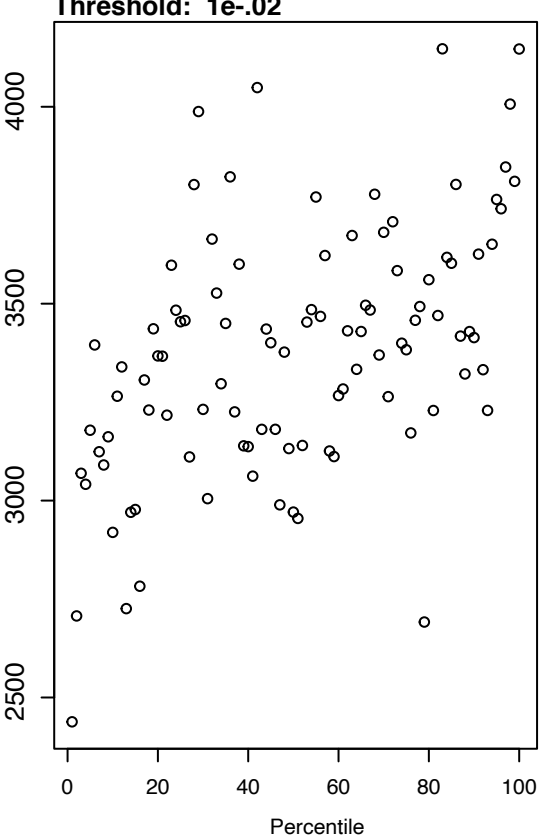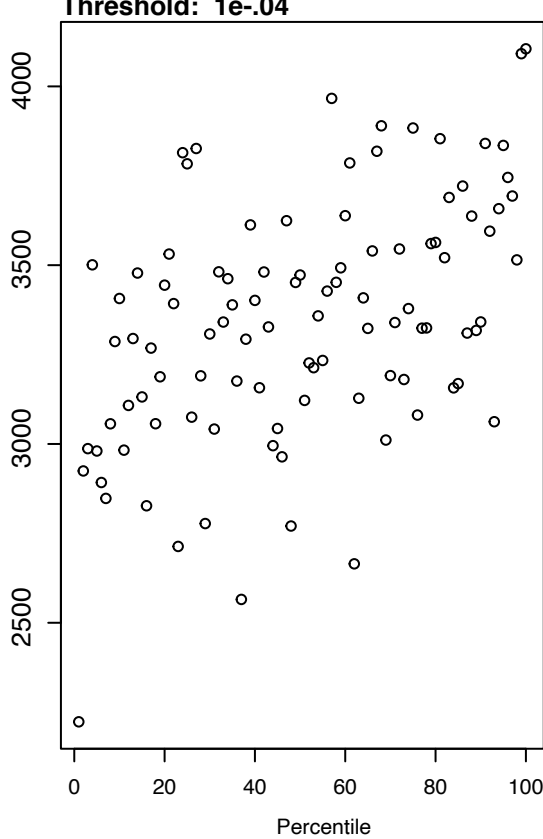

Both

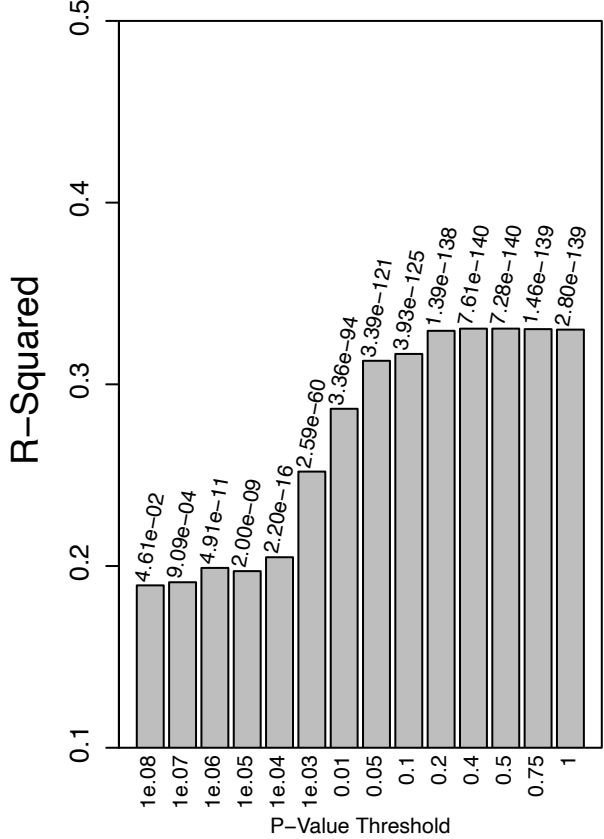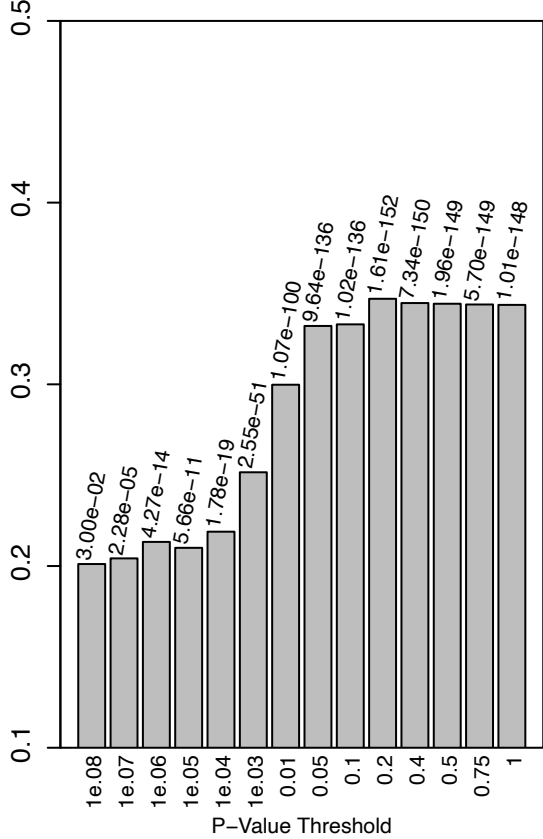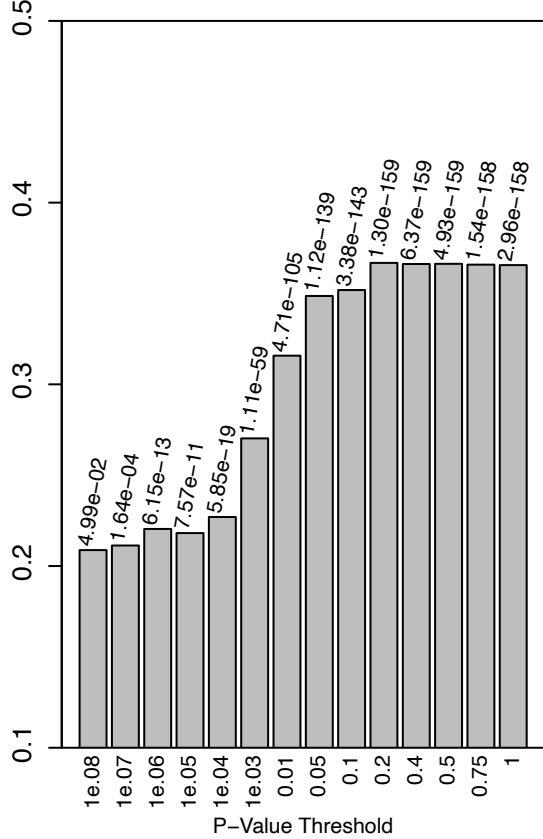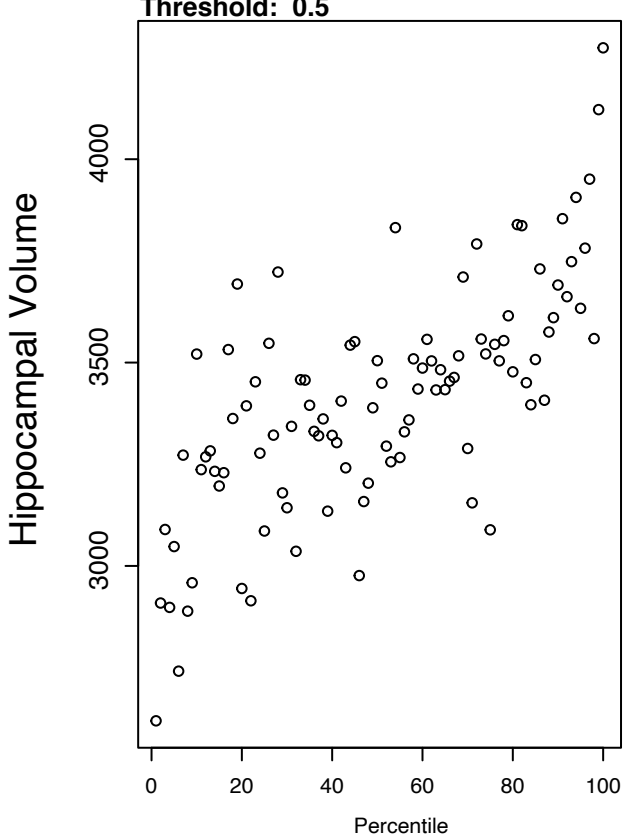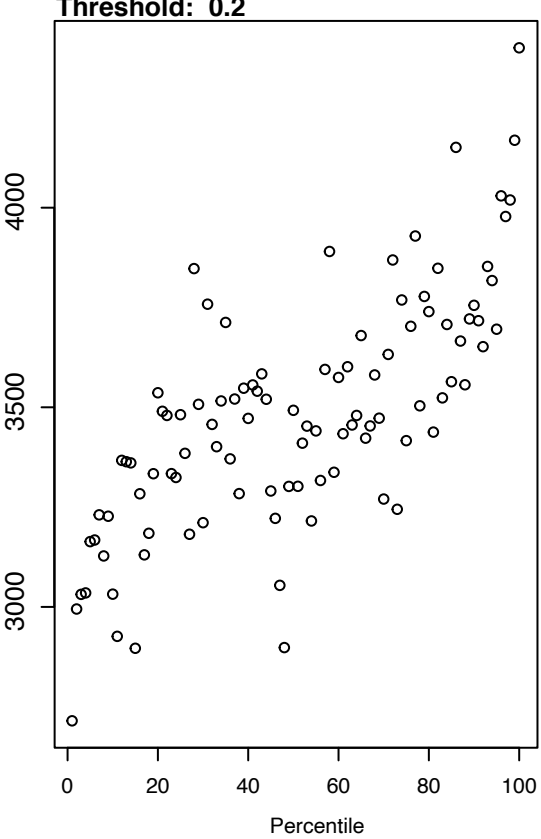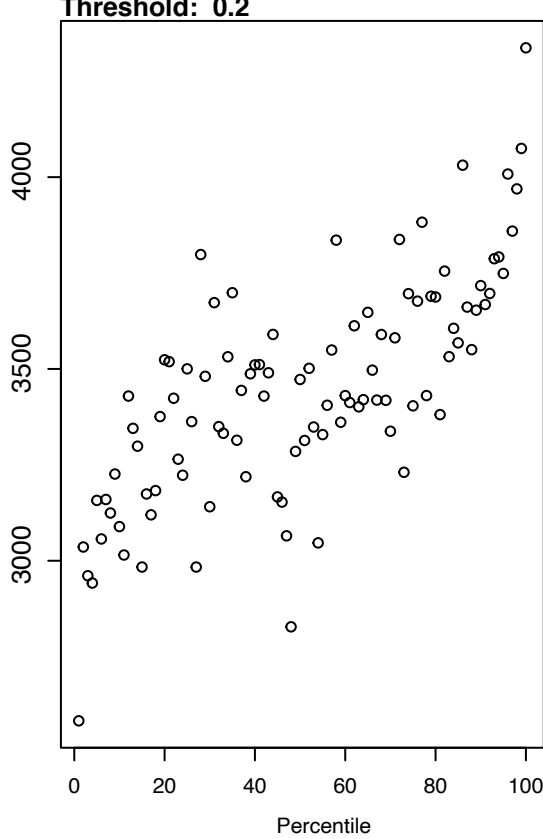

Supplement: supp [file elife-78232-supp-v1.zip]
